# Supplementary material for: Dietary Zinc Supplemented in Organic Form Affects the Expression of Inflammatory Molecules in Swine Intestine
Source: MDPI journal article supplement (doi:10.3390/ani13152519), 2023-08-04
Supplement: s1 [file s1]

## Supplementary Material

**Supplementary Table S1. Weight gain of pigs in different treatment groups**

| Item       | Diet      |      |       |      |       | SEM  | <i>p</i> -value |
|------------|-----------|------|-------|------|-------|------|-----------------|
|            | ZnR group | Zn50 | Zn100 | LQ50 | LQ100 |      |                 |
| ADG, kg/d  | 1.20      | 1.19 | 1.21  | 1.16 | 1.12  | 0.03 | 0.20            |
| ADFI, kg/d | 2.96      | 2.82 | 2.81  | 2.78 | 2.66  |      |                 |

ADG: Average daily gain; ADFI: Average daily feed intake

The results are least square means of nine pigs treated with the same diet. ZnR: ZnR: (Zn-free vitamin-mineral mix + 0 ppm Zn), Zn50: (ZnR with 50 ppm Zn from ZnCl<sub>2</sub>), Zn100: (ZnR with 100 ppm Zn from ZnCl<sub>2</sub>), LQ50: (ZnR with 50 ppm Zn from LQ-Zn), LQ100: (ZnR with 100 ppm Zn from LQ-Zn). SEM means standard error.

**Supplementary Table S2. Differentially expressed genes in Zn50 group vs LQ50 group**

| <b>Transcript ID</b> | <b>Gene description</b>                                                    | <b>Log2 fold change</b> | <b>p-value</b> |
|----------------------|----------------------------------------------------------------------------|-------------------------|----------------|
| ENSSSCT00000018609.3 | TNFAIP3 interacting protein 1                                              | -3.513225166            | 0.006398767    |
| ENSSSCT00000064304.1 | tetratricopeptide repeat domain 38                                         | -3.407471637            | 0.005685538    |
| ENSSSCT00000024467.2 | lithostathine-like                                                         | -3.319263217            | 5.73E-05       |
| ENSSSCT00000010090.3 | ATP-binding cassette sub-family G member 2-like                            | -3.287787957            | 0.00120746     |
| ENSSSCT00000044646.1 | TATA-box binding protein associated factor, RNA polymerase I subunit A     | -3.070691954            | 0.001891867    |
| ENSSSCT00000009101.3 | exocyst complex component 6B                                               | -3.047415705            | 0.037993933    |
| ENSSSCT00000055096.1 | XK related 9                                                               | -2.858200886            | 0.024425041    |
| ENSSSCT00000062907.1 | N/A                                                                        | -2.755164061            | 0.028145634    |
| ENSSSCT00000016255.3 | RAB30, member RAS oncogene family                                          | -2.709060135            | 0.004028253    |
| ENSSSCT00000046789.1 | interferon alpha and beta receptor subunit 2                               | -2.702254735            | 0.003796125    |
| ENSSSCT00000015136.3 | epidermal growth factor receptor pathway substrate 15 like 1               | -2.701595575            | 0.004147611    |
| ENSSSCT00000038998.1 | myoferlin                                                                  | -2.701355041            | 0.039874082    |
| ENSSSCT00000006983.3 | intelectin-2-like                                                          | -2.670138395            | 0.025536689    |
| ENSSSCT00000033063.2 | integrator complex subunit 6 like                                          | -2.641544482            | 0.013753713    |
| ENSSSCT00000061466.1 | transcription elongation factor A N-terminal and central domain containing | -2.582828032            | 0.011264154    |
| ENSSSCT00000044468.1 | tetratricopeptide repeat domain 39A                                        | -2.559267689            | 0.005928743    |
| ENSSSCT00000035464.2 | guanylate-binding protein 6                                                | -2.558786335            | 0.002839816    |
| ENSSSCT00000063298.1 | N(alpha)-acetyltransferase 16, NatA auxiliary subunit                      | -2.529171199            | 0.023560128    |
| ENSSSCT00000054433.1 | toll like receptor 2                                                       | -2.504011119            | 0.02069795     |
| ENSSSCT00000023711.2 | UBX domain protein 11                                                      | -2.468216068            | 0.032735322    |
| ENSSSCT00000057593.1 | proteasomal ATPase associated factor 1                                     | -2.456549021            | 0.015438489    |
| ENSSSCT00000031489.2 | phospholipid scramblase 1                                                  | -2.446918771            | 0.000877547    |
| ENSSSCT00000040813.1 | eukaryotic translation initiation factor 5                                 | -2.439114324            | 0.020221238    |
| ENSSSCT00000049093.1 | DDB1 and CUL4 associated factor 5                                          | -2.286328006            | 0.043020524    |
| ENSSSCT00000057064.1 | polyhomeotic homolog 3                                                     | -2.229829076            | 0.027724405    |
| ENSSSCT00000017706.3 | SP110 nuclear body protein                                                 | -2.227555279            | 0.042510888    |
| ENSSSCT00000037785.1 | sortilin related VPS10 domain containing receptor 2                        | -2.141693677            | 0.021000471    |
| ENSSSCT00000060349.1 | chromosome 1 C18orf25 homolog                                              | -2.101480495            | 0.039344637    |
| ENSSSCT00000060480.1 | N-glycanase 1                                                              | -2.097030826            | 0.02951043     |

|                      |                                                                   |              |             |
|----------------------|-------------------------------------------------------------------|--------------|-------------|
| ENSSSCT00000039871.1 | N/A                                                               | -2.09420064  | 0.033181564 |
| ENSSSCT00000035298.2 | neurocalcin delta                                                 | -2.059552954 | 0.021374781 |
| ENSSSCT00000002211.3 | syntaxin binding protein 6                                        | -2.027004385 | 0.00099521  |
| ENSSSCT00000063642.1 | ankyrin repeat and FYVE domain containing 1                       | -1.976716253 | 0.048119165 |
| ENSSSCT00000034011.2 | casein kinase 2 beta                                              | -1.961755156 | 0.046795073 |
| ENSSSCT00000009314.3 | N/A                                                               | -1.956201038 | 0.047200924 |
| ENSSSCT00000054913.1 | solute carrier family 12 member 6                                 | -1.95338103  | 0.00405913  |
| ENSSSCT00000047282.1 | dystrobrevin binding protein 1                                    | -1.945955034 | 0.037363869 |
| ENSSSCT00000010484.3 | transmembrane and coiled-coil domains 3                           | -1.936765683 | 0.020843787 |
| ENSSSCT00000026637.2 | coiled-coil domain containing 66                                  | -1.921742982 | 0.041569272 |
| ENSSSCT00000026212.2 | lithostathine-like                                                | -1.818799507 | 0.016205807 |
| ENSSSCT00000054142.1 | autophagy related 7                                               | -1.804566945 | 0.024344093 |
| ENSSSCT00000066043.1 | serine/threonine kinase 40                                        | -1.804525302 | 0.038768021 |
| ENSSSCT00000059075.1 | N/A                                                               | -1.802459613 | 0.020857056 |
| ENSSSCT00000034952.2 | lithostathine-like                                                | -1.791859808 | 0.010909468 |
| ENSSSCT00000016435.3 | apolipoprotein C3                                                 | -1.791574256 | 0.012770675 |
| ENSSSCT00000065983.1 | mitochondrial ribosomal protein L11                               | -1.763632457 | 0.038111723 |
| ENSSSCT00000044987.1 | ubiquitin specific peptidase 34                                   | -1.754065789 | 0.002345463 |
| ENSSSCT00000032794.2 | guanylate binding protein 1, interferon-inducible                 | -1.686142933 | 0.023665061 |
| ENSSSCT00000061852.1 | apolipoprotein A4                                                 | -1.659064515 | 0.014428336 |
| ENSSSCT00000035960.2 | deleted in malignant brain tumors 1                               | -1.655904363 | 0.00066116  |
| ENSSSCT00000016434.3 | apolipoprotein A4                                                 | -1.635163315 | 0.011545978 |
| ENSSSCT00000032333.2 | N/A                                                               | -1.603767545 | 0.039138766 |
| ENSSSCT00000008980.3 | lectin, mannose binding 2 like                                    | -1.583399507 | 0.028262828 |
| ENSSSCT00000029033.2 | synaptotagmin 12                                                  | -1.575029585 | 0.022389225 |
| ENSSSCT00000066145.1 | TANK binding kinase 1                                             | -1.534617483 | 0.04989232  |
| ENSSSCT00000054422.1 | apolipoprotein C3                                                 | -1.531618049 | 0.037561727 |
| ENSSSCT00000063395.1 | solute carrier family 30 member 5                                 | -1.517675668 | 0.012757594 |
| ENSSSCT00000063000.1 | STT3A, catalytic subunit of the oligosaccharyltransferase complex | -1.507933083 | 0.038356762 |
| ENSSSCT00000057863.1 | 3'(2'), 5'-bisphosphate nucleotidase 1                            | -1.49302696  | 0.006839811 |
| ENSSSCT00000035208.2 | FYN binding protein 1                                             | -1.480273781 | 0.022411796 |
| ENSSSCT00000006736.3 | carbonic anhydrase 13                                             | -1.469686042 | 0.022482409 |
| ENSSSCT00000051608.1 | N/A                                                               | -1.464791334 | 0.019734326 |

|                      |                                                                            |              |             |
|----------------------|----------------------------------------------------------------------------|--------------|-------------|
| ENSSSCT00000052291.1 | centromere protein O                                                       | -1.456325541 | 0.047810632 |
| ENSSSCT00000011816.2 | beta-1,3-galactosyltransferase 2                                           | -1.407720665 | 0.029509267 |
| ENSSSCT00000036737.1 | N/A                                                                        | -1.393990749 | 0.049320853 |
| ENSSSCT00000065002.1 | tryptophanyl-tRNA synthetase                                               | -1.392329044 | 3.28E-06    |
| ENSSSCT00000037379.1 | RCC1 and BTB domain containing protein 1                                   | -1.372247145 | 0.021357576 |
| ENSSSCT00000009132.3 | glutamine--fructose-6-phosphate transaminase 1                             | -1.362890813 | 0.045600934 |
| ENSSSCT00000049047.1 | N/A                                                                        | -1.336488793 | 0.028832637 |
| ENSSSCT00000053084.1 | calpastatin                                                                | -1.324185214 | 0.002905149 |
| ENSSSCT00000053953.1 | KIAA1211 ortholog                                                          | -1.3227409   | 0.029511612 |
| ENSSSCT00000016117.2 | N/A                                                                        | -1.301216372 | 0.020812321 |
| ENSSSCT00000065180.1 | nitric oxide synthase 2                                                    | -1.291739279 | 4.92E-05    |
| ENSSSCT00000051826.1 | U2 snRNP associated SURP domain containing                                 | -1.289737391 | 0.045570696 |
| ENSSSCT00000058188.1 | SLC9A3 regulator 1                                                         | -1.28684978  | 0.045798532 |
| ENSSSCT00000048959.1 | transmembrane channel like 5                                               | -1.280668176 | 0.046981769 |
| ENSSSCT00000013421.4 | ubiquitin specific peptidase 11                                            | -1.25580422  | 0.000870226 |
| ENSSSCT00000050257.1 | GTPase, very large interferon inducible 1                                  | -1.248787103 | 0.031632498 |
| ENSSSCT00000043753.1 | SPT2 chromatin protein domain containing 1                                 | -1.236569435 | 0.007143788 |
| ENSSSCT00000004701.2 | golgi associated PDZ and coiled-coil motif containing                      | -1.223227265 | 0.021384478 |
| ENSSSCT00000062032.1 | semaphorin 4B                                                              | -1.209040391 | 0.039468871 |
| ENSSSCT00000064480.1 | transcription elongation regulator 1                                       | -1.199824983 | 0.045938196 |
| ENSSSCT00000058969.1 | guanosine monophosphate reductase                                          | -1.190638852 | 0.047710383 |
| ENSSSCT00000037704.1 | N/A                                                                        | -1.168553776 | 0.00682783  |
| ENSSSCT00000014795.3 | crumbs 3, cell polarity complex component                                  | -1.162856107 | 0.031142832 |
| ENSSSCT00000045468.1 | globoside alpha-1,3-N-acetylgalactosaminyltransferase 1 (FORS blood group) | -1.146225053 | 0.006839842 |
| ENSSSCT00000059647.1 | UBA domain containing 2                                                    | -1.142174216 | 0.026770579 |
| ENSSSCT00000037353.1 | N/A                                                                        | -1.139767175 | 0.000692293 |
| ENSSSCT00000002141.3 | promyelocytic leukemia                                                     | -1.106962744 | 0.005489652 |
| ENSSSCT00000056748.1 | galectin 9                                                                 | -1.083223382 | 0.001638694 |
| ENSSSCT00000065175.1 |                                                                            | -1.082455311 | 0.013540924 |
| ENSSSCT00000006270.3 | argininosuccinate synthase 1                                               | -1.078354252 | 9.58E-05    |
| ENSSSCT00000038306.1 | N/A                                                                        | -1.075517794 | 0.041028573 |
| ENSSSCT00000056308.1 | Rho GTPase activating protein 8                                            | -1.069906143 | 0.048570371 |

|                       |                                                         |              |             |
|-----------------------|---------------------------------------------------------|--------------|-------------|
| ENSSSCT00000002555.4  | arginase 2                                              | -1.009382594 | 0.010812847 |
| ENSSSCT000000031638.2 | lysine demethylase 4A                                   | -0.983045105 | 0.011408154 |
| ENSSSCT000000044710.1 | BCL2 like 15                                            | -0.971493517 | 0.010757749 |
| ENSSSCT00000003489.2  | fucosyltransferase 2                                    | -0.934767883 | 0.040988873 |
| ENSSSCT000000053279.1 | solute carrier family 6 member 9                        | -0.934472408 | 0.031586038 |
| ENSSSCT000000030526.2 | guanylate binding protein 2,<br>interferon-inducible    | -0.931192225 | 0.034238209 |
| ENSSSCT000000039827.1 | MYC associated factor X                                 | -0.903238528 | 0.022952307 |
| ENSSSCT00000006932.3  | aldehyde dehydrogenase 9 family<br>member A1            | -0.89042723  | 0.005970285 |
| ENSSSCT000000012365.3 | SNF related kinase                                      | -0.859662076 | 0.047993214 |
| ENSSSCT000000026608.2 | DNA primase subunit 1                                   | -0.85618351  | 0.036719484 |
| ENSSSCT00000001595.4  | butyrophilin-like protein 1                             | -0.851065451 | 0.017259806 |
| ENSSSCT000000041931.1 | N/A                                                     | -0.815306001 | 0.023573408 |
| ENSSSCT000000015261.3 | LY6/PLAUR domain containing 8                           | -0.814254963 | 5.80E-09    |
| ENSSSCT000000044789.1 | 3-oxoacid CoA-transferase 1                             | -0.807310535 | 0.01832443  |
| ENSSSCT000000059131.1 | BCL2 like 15                                            | -0.793811466 | 0.016477411 |
| ENSSSCT000000061681.1 | argininosuccinate synthase 1                            | -0.792777389 | 0.007070418 |
| ENSSSCT000000057681.1 | sideroflexin 1                                          | -0.790469707 | 0.026527453 |
| ENSSSCT000000035232.2 | interferon regulatory factor 7                          | -0.766214797 | 0.022302993 |
| ENSSSCT000000059937.1 | tetraspanin 1                                           | -0.762820621 | 0.029630716 |
| ENSSSCT000000019325.3 | nitric oxide synthase 2                                 | -0.753143435 | 0.004341459 |
| ENSSSCT000000014648.3 | adrenomedullin                                          | -0.743109483 | 0.039455722 |
| ENSSSCT000000018765.3 | CD300c molecule                                         | -0.735835827 | 0.046592162 |
| ENSSSCT000000046926.1 | legumain                                                | -0.698455494 | 0.030446925 |
| ENSSSCT000000028621.2 | interleukin 18 binding protein                          | -0.660321096 | 0.034057051 |
| ENSSSCT000000025376.2 | basic leucine zipper ATF-like<br>transcription factor 2 | -0.659117381 | 0.00373003  |
| ENSSSCT000000011756.3 | DEAH-box helicase 32 (putative)                         | -0.642316456 | 0.040386419 |
| ENSSSCT000000010934.3 | adaptor related protein complex 1<br>subunit beta 1     | -0.628839435 | 0.035521366 |
| ENSSSCT000000005528.3 | ADP ribosylation factor 6                               | -0.605611648 | 0.018145748 |
| ENSSSCT000000016571.3 | hepatic and glial cell adhesion<br>molecule             | -0.604874192 | 0.020908795 |
| ENSSSCT000000002537.3 | glutathione peroxidase 2                                | -0.596970565 | 0.005450085 |
| ENSSSCT000000061945.1 | guanylate binding protein 1,<br>interferon-inducible    | -0.593047916 | 0.038170414 |
| ENSSSCT000000024524.2 | protein phosphatase 4 regulatory<br>subunit 1           | -0.589791068 | 0.00759609  |

|                      |                                                        |              |             |
|----------------------|--------------------------------------------------------|--------------|-------------|
| ENSSSCT00000063487.1 | heat shock protein family A (Hsp70)<br>member 8        | -0.589643274 | 0.007110243 |
| ENSSSCT00000063260.1 | poly(ADP-ribose) polymerase family<br>member 9         | -0.585389931 | 0.019636658 |
| ENSSSCT00000037199.1 | dual specificity phosphatase 6                         | -0.582386413 | 0.028996624 |
| ENSSSCT00000065553.1 | uridine phosphorylase 1                                | -0.575523213 | 0.016407208 |
| ENSSSCT00000045547.1 | actin gamma 1                                          | -0.573243875 | 0.01437517  |
| ENSSSCT00000052265.1 | erythrocyte membrane protein band<br>4.1 like 3        | -0.573181494 | 0.023918264 |
| ENSSSCT00000027977.2 | trefoil factor 2                                       | -0.572521071 | 0.027259813 |
| ENSSSCT00000029497.2 | 7-dehydrocholesterol reductase                         | -0.562336747 | 0.016346651 |
| ENSSSCT00000057292.1 | carbohydrate sulfotransferase 4                        | -0.561592532 | 0.024717759 |
| ENSSSCT00000055407.1 | interferon-induced very large GTPase<br>1-like         | -0.558752835 | 0.028201173 |
| ENSSSCT00000014465.3 | ADP ribosylation factor GTPase<br>activating protein 2 | -0.533283377 | 0.021315584 |
| ENSSSCT00000044432.1 | serine/threonine kinase 24                             | -0.523249697 | 0.035273875 |
| ENSSSCT00000058772.1 | interferon induced transmembrane<br>protein 3          | -0.517224236 | 0.040538953 |
| ENSSSCT00000003977.3 | sphingomyelin phosphodiesterase acid<br>like 3B        | -0.508870651 | 0.041962666 |
| ENSSSCT00000062753.1 | clathrin light chain A                                 | -0.490938187 | 0.020418147 |
| ENSSSCT00000004323.3 | tetraspanin 1                                          | -0.489896209 | 0.020192235 |
| ENSSSCT00000064890.1 | NCK adaptor protein 2                                  | -0.485029284 | 0.036809331 |
| ENSSSCT00000064525.1 | actin related protein 2/3 complex<br>subunit 2         | -0.478788575 | 0.04589156  |
| ENSSSCT00000024216.2 | solute carrier family 43 member 2                      | -0.477561962 | 0.029734379 |
| ENSSSCT00000048970.1 | glucose-6-phosphate dehydrogenase                      | -0.473520413 | 0.006427094 |
| ENSSSCT00000035478.2 | tripartite motif containing 25                         | -0.472176948 | 0.033794329 |
| ENSSSCT00000053991.1 | RAB7A, member RAS oncogene<br>family                   | -0.471696306 | 0.006151996 |
| ENSSSCT00000051775.1 | RALY heterogeneous nuclear<br>ribonucleoprotein        | -0.466360579 | 0.042611493 |
| ENSSSCT00000040939.1 | oxoglutarate dehydrogenase                             | -0.459414652 | 0.040511157 |
| ENSSSCT00000053446.1 | mitogen-activated protein kinase 3                     | -0.436784957 | 0.019884309 |
| ENSSSCT00000001103.3 | serpin family B member 1                               | -0.431825186 | 0.023013316 |
| ENSSSCT00000005376.2 | carnosine dipeptidase 2                                | -0.427471662 | 0.040027062 |
| ENSSSCT00000053600.1 | Rho GTPase activating protein 17                       | -0.42186694  | 0.042575422 |
| ENSSSCT00000007584.4 | guanylate binding protein 1,<br>interferon-inducible   | -0.419300588 | 0.033518969 |
| ENSSSCT00000055437.1 | protein phosphatase 2 phosphatase<br>activator         | -0.41019122  | 0.017548076 |
| ENSSSCT00000027356.2 | leucine aminopeptidase 3                               | -0.409948977 | 0.021247107 |

|                      |                                                                                     |              |             |
|----------------------|-------------------------------------------------------------------------------------|--------------|-------------|
| ENSSSCT00000028713.2 | UDP-galactose-4-epimerase                                                           | -0.40878454  | 0.013875496 |
| ENSSSCT00000063535.1 | citrate synthase                                                                    | -0.406726351 | 0.028983042 |
| ENSSSCT00000055817.1 | enolase 1                                                                           | -0.399048497 | 0.028455401 |
| ENSSSCT00000000402.3 | sulfite oxidase                                                                     | -0.381169379 | 0.029924349 |
| ENSSSCT00000007975.3 | transient receptor potential cation channel subfamily C member 4 associated protein | -0.381019925 | 0.048625695 |
| ENSSSCT00000011231.3 | pyrophosphatase (inorganic) 1                                                       | -0.375733023 | 0.026911904 |
| ENSSSCT00000003210.3 | RNA binding motif protein 42                                                        | -0.373672255 | 0.024348326 |
| ENSSSCT00000022886.2 | phosphatidylinositol transfer protein alpha                                         | -0.363712051 | 0.003729557 |
| ENSSSCT00000057321.1 | hydroxyacyl-CoA dehydrogenase                                                       | -0.361425929 | 0.026782034 |
| ENSSSCT00000024290.2 | sphingosine kinase 2                                                                | -0.358070605 | 0.048560362 |
| ENSSSCT00000014210.3 | calpain 1                                                                           | -0.357990527 | 0.041495478 |
| ENSSSCT00000039383.1 | LIM and SH3 protein 1                                                               | -0.35473195  | 0.032752442 |
| ENSSSCT00000041757.1 | proteasome 26S subunit, non-ATPase 4                                                | -0.349263408 | 0.028358824 |
| ENSSSCT00000007592.3 | SH3 domain containing GRB2 like, endophilin B1                                      | -0.347255437 | 0.002350515 |
| ENSSSCT00000008551.3 | Tu translation elongation factor, mitochondrial                                     | -0.345766595 | 0.020857629 |
| ENSSSCT00000044242.1 | adhesion regulating molecule 1                                                      | -0.317814393 | 0.016438895 |
| ENSSSCT00000031590.2 | calpain small subunit 1                                                             | -0.315964885 | 0.01721292  |
| ENSSSCT00000042867.1 | Rho GDP dissociation inhibitor alpha                                                | -0.314876691 | 0.041768745 |
| ENSSSCT00000057478.1 | signal transducer and activator of transcription 3                                  | -0.312505859 | 0.025714627 |
| ENSSSCT00000065139.1 | actin beta                                                                          | -0.309436761 | 0.032958247 |
| ENSSSCT00000003774.3 | phosphogluconate dehydrogenase                                                      | -0.278721325 | 0.016229913 |
| ENSSSCT00000049038.1 | chromosome 7 C6orf106 homolog                                                       | -0.278380998 | 0.033840007 |
| ENSSSCT00000018738.3 | Jupiter microtubule associated homolog 1                                            | -0.276309267 | 0.01631853  |
| ENSSSCT00000030514.2 | protein phosphatase 2 scaffold subunit Aalpha                                       | -0.27527631  | 0.045309463 |
| ENSSSCT00000002075.3 | isocitrate dehydrogenase (NADP(+)) 2, mitochondrial                                 | -0.267622997 | 0.016973979 |
| ENSSSCT00000019298.3 | proteasome 26S subunit, non-ATPase 11                                               | -0.262026014 | 0.046112554 |
| ENSSSCT00000013443.4 | proteolipid protein 2                                                               | -0.247340567 | 0.030318143 |
| ENSSSCT00000053199.1 | JunD proto-oncogene, AP-1 transcription factor subunit                              | -0.228895718 | 0.048169312 |
| ENSSSCT00000039540.1 | Rac family small GTPase 1                                                           | -0.215540073 | 0.033899122 |
| ENSSSCT00000054290.1 | synaptophysin like 1                                                                | 0.301988176  | 0.006451118 |
| ENSSSCT00000059250.1 | sorting nexin 2                                                                     | 0.338186961  | 0.045986845 |

|                      |                                                        |             |             |
|----------------------|--------------------------------------------------------|-------------|-------------|
| ENSSSCT00000017523.3 | CDC like kinase 1                                      | 0.350563648 | 0.014894947 |
| ENSSSCT00000049560.1 | anaphase promoting complex subunit 13                  | 0.417062419 | 0.031848228 |
| ENSSSCT00000005728.3 | distal membrane arm assembly complex 1                 | 0.419203473 | 0.005244475 |
| ENSSSCT00000025147.2 | histone cluster 1, H2bd                                | 0.474219508 | 0.032318089 |
| ENSSSCT00000060390.1 | translocase of inner mitochondrial membrane 10B        | 0.525571131 | 0.025590746 |
| ENSSSCT00000036085.2 | interleukin 18                                         | 0.527802131 | 0.025522583 |
| ENSSSCT00000007500.3 | solute carrier family 25 member 24                     | 0.591028289 | 0.017308112 |
| ENSSSCT00000019677.1 | cytochrome c oxidase subunit III                       | 0.68364574  | 0.041998449 |
| ENSSSCT00000019673.1 | cytochrome c oxidase subunit II                        | 0.685031467 | 0.037485583 |
| ENSSSCT00000019679.3 | NADH dehydrogenase subunit 3                           | 0.696227699 | 0.03615784  |
| ENSSSCT00000019675.1 | ATP synthase F0 subunit 8                              | 0.72406022  | 0.043966946 |
| ENSSSCT00000019670.1 | cytochrome c oxidase subunit I                         | 0.731576392 | 0.042510767 |
| ENSSSCT00000006801.3 | serine/threonine-protein kinase Sgk3                   | 0.731899541 | 0.035995056 |
| ENSSSCT00000051906.1 | ubiquitin specific peptidase 34                        | 0.734999749 | 0.013450943 |
| ENSSSCT00000019676.1 | ATP synthase F0 subunit 6                              | 0.742480403 | 0.033196324 |
| ENSSSCT00000012791.3 | procollagen C-endopeptidase enhancer 2                 | 0.75345099  | 0.036356546 |
| ENSSSCT00000019687.1 | NADH dehydrogenase subunit 6                           | 0.755216303 | 0.02782251  |
| ENSSSCT00000019664.4 | NADH dehydrogenase subunit 2                           | 0.759444956 | 0.032508028 |
| ENSSSCT00000060569.1 | transmembrane protein 230                              | 0.764695683 | 0.019516445 |
| ENSSSCT00000043338.1 | X-ray repair cross complementing 4                     | 0.767920632 | 0.048837809 |
| ENSSSCT00000066360.1 | FK506 binding protein 5                                | 0.783590163 | 0.045552846 |
| ENSSSCT00000019689.3 | cytochrome b                                           | 0.792168542 | 0.033234044 |
| ENSSSCT00000019682.3 | NADH dehydrogenase subunit 4                           | 0.794780371 | 0.0283062   |
| ENSSSCT00000042533.1 | UDP-glucuronosyltransferase 2C1-like                   | 0.82704293  | 0.039496397 |
| ENSSSCT00000029057.2 | glycoprotein, alpha-galactosyltransferase 1 pseudogene | 0.830476287 | 0.049575848 |
| ENSSSCT00000061719.1 | SEC24 homolog A, COPII coat complex component          | 0.831943709 | 0.015819541 |
| ENSSSCT00000019686.3 | NADH dehydrogenase subunit 5                           | 0.833613737 | 0.037175341 |
| ENSSSCT00000019681.2 | NADH dehydrogenase subunit 4L                          | 0.857353101 | 0.031726774 |
| ENSSSCT00000014592.3 | SPT2 chromatin protein domain containing 1             | 0.859952181 | 0.046137277 |
| ENSSSCT00000056248.1 | surfactant associated 2                                | 0.861459608 | 0.045124686 |
| ENSSSCT00000018461.3 | erbb2 interacting protein                              | 0.868735176 | 0.036093288 |
| ENSSSCT00000035892.2 | TatD DNase domain containing 1                         | 0.88067262  | 0.004375695 |
| ENSSSCT00000016727.3 | scinderin                                              | 0.90024785  | 0.047735547 |



|                       |                                                                        |             |             |
|-----------------------|------------------------------------------------------------------------|-------------|-------------|
| ENSSSCT00000005070.3  | ring finger protein 111                                                | 0.904421857 | 0.034585423 |
| ENSSSCT00000001791.3  | nuclear transcription factor Y subunit alpha                           | 0.9389861   | 0.049653044 |
| ENSSSCT000000058080.1 | calpastatin                                                            | 0.939436745 | 0.003721882 |
| ENSSSCT000000025069.2 | limb and CNS expressed 1                                               | 0.947359547 | 0.036153737 |
| ENSSSCT000000066118.1 | matrin 3                                                               | 0.969395536 | 0.041862259 |
| ENSSSCT000000057295.1 | TATA-box binding protein associated factor, RNA polymerase I subunit A | 0.980510138 | 0.039378275 |
| ENSSSCT000000059541.1 | NUMB, endocytic adaptor protein                                        | 0.994074682 | 0.039717082 |
| ENSSSCT000000056975.1 | dynein cytoplasmic 2 light intermediate chain 1                        | 1.026590368 | 0.027895702 |
| ENSSSCT000000049279.1 | N/A                                                                    | 1.046984995 | 0.022889628 |
| ENSSSCT000000019506.4 | arachidonate 12-lipoxygenase, 12S type                                 | 1.119344876 | 0.024131485 |
| ENSSSCT000000046065.1 | high mobility group box 1                                              | 1.141810055 | 0.030791976 |
| ENSSSCT000000058817.1 | gap junction protein beta 3                                            | 1.213171597 | 0.044337761 |
| ENSSSCT000000003507.3 | lin-7 homolog B, crumbs cell polarity complex component                | 1.254493799 | 0.033275062 |
| ENSSSCT000000013984.4 | renin binding protein                                                  | 1.319414914 | 0.016990343 |
| ENSSSCT000000034393.2 | nuclear factor of activated T cells 2                                  | 1.396573343 | 0.034885175 |
| ENSSSCT000000033983.2 | integrator complex subunit 6 like                                      | 1.422027797 | 0.042459301 |
| ENSSSCT000000039888.1 | CD47 molecule                                                          | 1.434350484 | 0.007193526 |
| ENSSSCT000000042063.1 | hydroxysteroid dehydrogenase like 1                                    | 1.446927744 | 0.044418604 |
| ENSSSCT000000065528.1 | tRNA splicing endonuclease subunit 34                                  | 1.529526473 | 0.030499766 |
| ENSSSCT000000059149.1 | ADP ribosylation factor interacting protein 1                          | 1.565048883 | 0.044994446 |
| ENSSSCT000000057278.1 | solute carrier family 30 member 5                                      | 1.571714421 | 0.005059359 |
| ENSSSCT000000000313.3 | zinc finger protein 385A                                               | 1.607845139 | 0.049211061 |
| ENSSSCT000000035470.2 | motile sperm domain containing 1                                       | 1.619021758 | 0.014229088 |
| ENSSSCT000000059338.1 | N/A                                                                    | 1.625621682 | 0.001694636 |
| ENSSSCT000000059636.1 | DnaJ heat shock protein family (Hsp40) member C24                      | 1.659996701 | 0.035972141 |
| ENSSSCT000000013101.3 | collagen type VIII alpha 1 chain                                       | 1.661266493 | 0.011333413 |
| ENSSSCT000000047450.1 | ClpB homolog, mitochondrial AAA ATPase chaperonin                      | 1.692150038 | 0.024425479 |
| ENSSSCT000000017314.3 | growth factor receptor bound protein 14                                | 1.72291377  | 0.024884055 |
| ENSSSCT000000054316.1 | myosin heavy chain 11                                                  | 1.72472002  | 0.049084891 |
| ENSSSCT000000043603.1 | matrix remodeling associated 7                                         | 1.830504205 | 0.025622202 |
| ENSSSCT000000054049.1 | ST3 beta-galactoside alpha-2,3-sialyltransferase 6                     | 1.882161204 | 0.045423658 |
| ENSSSCT000000012961.3 | tyrosine kinase non receptor 2                                         | 1.902062951 | 0.049726827 |

|                      |                                              |             |             |
|----------------------|----------------------------------------------|-------------|-------------|
| ENSSSCT00000045220.1 | ring finger protein 219                      | 1.954034533 | 0.044554292 |
| ENSSSCT00000064461.1 | kelch repeat and BTB domain<br>containing 3  | 1.960119646 | 0.047375183 |
| ENSSSCT00000064172.1 | lunapark, ER junction formation factor       | 1.997218285 | 0.033387752 |
| ENSSSCT00000032954.2 | interleukin 33                               | 2.002789152 | 0.033050892 |
| ENSSSCT00000028858.2 | apoptotic peptidase activating factor 1      | 2.040512981 | 0.003999006 |
| ENSSSCT00000023681.2 | complement C3                                | 2.069494032 | 0.002517851 |
| ENSSSCT00000038072.1 | polyhomeotic homolog 3                       | 2.077968221 | 0.040782502 |
| ENSSSCT00000051632.1 | pre-mRNA processing factor 6                 | 2.161780974 | 0.021525416 |
| ENSSSCT00000010807.3 | tescalcin                                    | 2.164993187 | 0.040849618 |
| ENSSSCT00000065122.1 | mitochondrial calcium uptake 1               | 2.23415028  | 0.026707955 |
| ENSSSCT00000038407.1 | ATPase family, AAA domain<br>containing 5    | 2.259818377 | 0.037806055 |
| ENSSSCT00000017668.3 | phenylalanyl-tRNA synthetase subunit<br>beta | 2.272078767 | 0.039646535 |
| ENSSSCT00000033380.2 | Fc fragment of IgA and IgM receptor          | 2.35366181  | 0.030279916 |
| ENSSSCT00000000448.3 | retinol dehydrogenase 16 (all-trans)         | 2.399917181 | 0.020413242 |
| ENSSSCT00000040161.1 | regulatory factor X7                         | 2.414353755 | 0.038800505 |
| ENSSSCT00000063614.1 | oviductal glycoprotein 1                     | 2.442069345 | 0.031603792 |
| ENSSSCT00000013823.3 | stromal antigen 2                            | 2.443585152 | 0.01581054  |
| ENSSSCT00000049905.1 | cysteine rich protein 3                      | 2.459211083 | 0.008013765 |
| ENSSSCT00000038494.1 | zinc finger protein 22                       | 2.463597258 | 0.010806034 |
| ENSSSCT00000039185.1 | kelch like family member 24                  | 2.481161163 | 0.022801934 |
| ENSSSCT00000051840.1 | cytoplasmic linker associated protein 2      | 2.516621907 | 0.028354365 |
| ENSSSCT00000038930.1 | O-GlcNAcase                                  | 2.561542887 | 0.024833491 |
| ENSSSCT00000054336.1 | prune exopolyphosphatase 1                   | 2.570061775 | 0.024742052 |
| ENSSSCT00000043726.1 | centrosomal protein 164                      | 2.645271879 | 0.04895139  |
| ENSSSCT00000065697.1 | SREBF chaperone                              | 2.70826019  | 0.007401059 |
| ENSSSCT00000049855.1 | solute carrier family 38 member 6            | 2.726421909 | 0.005895477 |
| ENSSSCT00000054259.1 |                                              | 2.778472624 | 0.041750346 |
| ENSSSCT00000054879.1 | deoxyribose-phosphate aldolase               | 2.784386821 | 0.005083522 |
| ENSSSCT00000007741.3 | N/A                                          | 2.926480326 | 0.002353708 |
| ENSSSCT00000040830.1 | lactate dehydrogenase A                      | 2.959469677 | 0.011738444 |
| ENSSSCT00000001147.3 | TBC1 domain family member 7                  | 3.006870677 | 0.003556076 |
| ENSSSCT00000062599.1 | phospholipase C beta 4                       | 3.017118093 | 0.024254038 |
| ENSSSCT00000000873.3 | anoctamin 6                                  | 3.033938674 | 0.04161469  |

|                      |                                                 |             |             |
|----------------------|-------------------------------------------------|-------------|-------------|
| ENSSSCT00000060910.1 | transmembrane 7 superfamily member<br>3         | 3.333125425 | 0.019481025 |
| ENSSSCT00000050336.1 | N/A                                             | 3.429917188 | 0.017613485 |
| ENSSSCT00000040036.1 | nuclear transcription factor Y subunit<br>gamma | 3.69865234  | 0.022031301 |
| ENSSSCT00000029478.2 | formin binding protein 4                        | 3.985865578 | 0.000388679 |
| ENSSSCT00000063099.1 | N/A                                             | 5.493951298 | 0.000538038 |

**Supplementary Table S3. Differentially expressed genes in Zn100 group vs LQ100 group**

| Transcript ID        | Gene description                                           | Log2 fold change | p-value     |
|----------------------|------------------------------------------------------------|------------------|-------------|
| ENSSSCT00000003882.3 | phospholipase A2 group IIA                                 | -24.18392058     | 4.27E-16    |
| ENSSSCT00000063073.1 | N/A                                                        | -5.903916273     | 0.000112334 |
| ENSSSCT00000053941.1 | N/A                                                        | -5.273874536     | 0.048456491 |
| ENSSSCT00000050495.1 | N/A                                                        | -5.014812688     | 0.004904666 |
| ENSSSCT00000034766.2 | ribosomal protein S16                                      | -4.611898167     | 0.011524424 |
| ENSSSCT00000041456.1 | N/A                                                        | -4.577389615     | 0.044041698 |
| ENSSSCT00000051287.1 | heterochromatin protein 1 binding protein 3                | -4.183412477     | 0.002541254 |
| ENSSSCT00000066245.1 | ribosomal protein L19                                      | -3.78767304      | 0.006272101 |
| ENSSSCT00000055308.1 | phosphatidylinositol glycan anchor biosynthesis class X    | -3.527025558     | 0.010508811 |
| ENSSSCT00000054526.1 | N-glycanase 1                                              | -3.304585282     | 0.002805301 |
| ENSSSCT00000044293.1 | joining chain of multimeric IgA and IgM                    | -3.278880633     | 0.002987103 |
| ENSSSCT00000002379.3 | chromodomain helicase DNA binding protein 8                | -3.258788529     | 0.008217896 |
| ENSSSCT00000018034.3 | ubiquitin conjugating enzyme E2 H                          | -3.159968593     | 0.002541668 |
| ENSSSCT00000029955.2 | phosphofructokinase, muscle                                | -3.155249834     | 0.034885607 |
| ENSSSCT00000053191.1 | N/A                                                        | -3.141907636     | 0.002868669 |
| ENSSSCT00000029449.2 | nucleolar protein interacting with the FHA domain of MKI67 | -3.118066083     | 2.25E-05    |
| ENSSSCT00000038131.1 | nuclear transcription factor Y subunit gamma               | -3.079956696     | 0.003515179 |
| ENSSSCT00000059280.1 | spectrin alpha, non-erythrocytic 1                         | -2.884628886     | 0.00805423  |
| ENSSSCT00000039720.1 | sulfatase modifying factor 1                               | -2.844852009     | 0.039321202 |
| ENSSSCT00000040161.1 | regulatory factor X7                                       | -2.833137172     | 0.00908819  |
| ENSSSCT00000016994.3 | integrator complex subunit 7                               | -2.728006311     | 0.022725629 |
| ENSSSCT00000058306.1 | basic leucine zipper and W2 domains 2                      | -2.712461916     | 0.00713979  |
| ENSSSCT00000061087.1 | DNA methyltransferase 3 alpha                              | -2.622227139     | 0.036543353 |
| ENSSSCT00000037570.1 | protein tyrosine phosphatase, receptor type F              | -2.62108055      | 0.003885315 |
| ENSSSCT00000002344.2 | N/A                                                        | -2.593953515     | 0.002324262 |
| ENSSSCT00000059451.1 | basic helix-loop-helix family member b9                    | -2.531244356     | 0.019709583 |
| ENSSSCT00000049089.1 | ITPRIP like 1                                              | -2.530826135     | 0.04405131  |
| ENSSSCT00000061972.1 | RB binding protein 4, chromatin remodeling factor          | -2.46768638      | 0.006887848 |

|                      |                                                                                                                 |              |             |
|----------------------|-----------------------------------------------------------------------------------------------------------------|--------------|-------------|
| ENSSSCT00000057440.1 | shisa family member 5                                                                                           | -2.453398039 | 0.005664222 |
| ENSSSCT00000031253.2 | oxidation resistance 1                                                                                          | -2.433108324 | 0.009657193 |
| ENSSSCT00000062108.1 | prickle planar cell polarity protein 4                                                                          | -2.402351002 | 0.015757073 |
| ENSSSCT00000005458.3 | zwilch kinetochore protein                                                                                      | -2.386681586 | 0.022207086 |
| ENSSSCT00000039327.1 | selenium binding protein 1                                                                                      | -2.379572571 | 0.038065514 |
| ENSSSCT00000057380.1 | transmembrane protein 51                                                                                        | -2.368501555 | 0.039642755 |
| ENSSSCT00000040326.1 | chromosome 11 open reading frame 74                                                                             | -2.365644781 | 0.038045998 |
| ENSSSCT00000012564.3 | chromosome 3 open reading frame 67                                                                              | -2.353099185 | 0.03930438  |
| ENSSSCT00000025172.2 | bactericidal permeability increasing protein                                                                    | -2.331708999 | 0.014941106 |
| ENSSSCT00000049559.1 | N/A                                                                                                             | -2.314749201 | 0.02657465  |
| ENSSSCT00000050316.1 | HMG-box containing 4                                                                                            | -2.290427612 | 0.016011168 |
| ENSSSCT00000060710.1 | protein phosphatase 4 regulatory subunit 3B                                                                     | -2.261911416 | 0.027099403 |
| ENSSSCT00000009621.3 | ras homolog family member H                                                                                     | -2.250374708 | 0.022657354 |
| ENSSSCT00000046817.1 | tyrosine 3-monooxygenase/tryptophan 5-monooxygenase activation protein zeta                                     | -2.247118058 | 0.015901325 |
| ENSSSCT00000058789.1 | ArfGAP with FG repeats 1                                                                                        | -2.242777923 | 0.022847104 |
| ENSSSCT00000009044.3 | lithostathine-like                                                                                              | -2.241301125 | 0.023877355 |
| ENSSSCT00000025743.2 | chromosome 5 open reading frame 30                                                                              | -2.2306236   | 0.029331195 |
| ENSSSCT00000049484.1 | S100 calcium binding protein G                                                                                  | -2.20213433  | 0.023640143 |
| ENSSSCT00000055051.1 | Ras association domain family member 1                                                                          | -2.181828543 | 0.0136707   |
| ENSSSCT00000042792.1 | phosphatidylinositol transfer protein membrane associated 2                                                     | -2.140741074 | 0.031567014 |
| ENSSSCT00000057213.1 | forkhead box N2                                                                                                 | -2.129238986 | 0.024263923 |
| ENSSSCT00000043897.1 | fatty acyl-CoA reductase 1                                                                                      | -2.10787322  | 0.005684661 |
| ENSSSCT00000040591.1 | zinc finger protein 280D                                                                                        | -2.092444188 | 0.042463155 |
| ENSSSCT00000045691.1 |                                                                                                                 | -2.024328848 | 0.049249475 |
| ENSSSCT00000054734.1 | SWI/SNF-related, matrix-associated actin-dependent regulator of chromatin, subfamily a, containing DEAD/H box 1 | -2.012089904 | 0.041471078 |
| ENSSSCT00000010484.3 | transmembrane and coiled-coil domains 3                                                                         | -2.000529861 | 0.035595559 |
| ENSSSCT00000011794.3 | synaptonemal complex central element protein 1                                                                  | -1.981172525 | 0.049690259 |
| ENSSSCT00000046440.1 | tetraspanin 5                                                                                                   | -1.929212169 | 0.007939269 |
| ENSSSCT00000055045.1 | TBC1 domain family member 7                                                                                     | -1.923133113 | 0.047455512 |

|                      |                                                              |              |             |
|----------------------|--------------------------------------------------------------|--------------|-------------|
| ENSSSCT00000050638.1 | HtrA serine peptidase 4                                      | -1.869959914 | 0.046233965 |
| ENSSSCT00000050197.1 | ITPR interacting domain containing 2                         | -1.823205528 | 0.043321334 |
| ENSSSCT00000056966.1 | N/A                                                          | -1.7790778   | 0.034539726 |
| ENSSSCT00000063561.1 | chromosome transmission fidelity factor 8                    | -1.757218674 | 0.04724822  |
| ENSSSCT00000029842.2 | solute carrier family 40 member 1                            | -1.737232877 | 0.011947468 |
| ENSSSCT00000057915.1 | retinoic acid receptor responder 2                           | -1.723709625 | 0.027064178 |
| ENSSSCT00000009007.3 | pentatricopeptide repeat domain 3                            | -1.712602524 | 0.017737748 |
| ENSSSCT00000048045.1 | phosphatidylinositol 3-kinase catalytic subunit type 3       | -1.667678559 | 0.017049353 |
| ENSSSCT00000057354.1 | EF-hand calcium binding domain 14                            | -1.649656928 | 0.031930266 |
| ENSSSCT00000010929.3 | rhomboid domain containing 3                                 | -1.626530265 | 0.022042211 |
| ENSSSCT00000047652.1 | kinesin family member 2C                                     | -1.624579843 | 0.022274968 |
| ENSSSCT00000063644.1 | solute carrier family 6 member 9                             | -1.615778965 | 0.036602397 |
| ENSSSCT00000032434.2 | low density lipoprotein receptor class A domain containing 4 | -1.615542066 | 0.036176792 |
| ENSSSCT00000004712.3 | zinc finger containing ubiquitin peptidase 1                 | -1.589657178 | 0.041064465 |
| ENSSSCT00000050142.1 | ER degradation enhancing alpha-mannosidase like protein 3    | -1.587206326 | 0.031895276 |
| ENSSSCT00000059923.1 | F-box protein 25                                             | -1.567997359 | 0.003585989 |
| ENSSSCT00000037953.1 | thyroid hormone receptor interactor 12                       | -1.538103572 | 0.019509486 |
| ENSSSCT00000049618.1 | thyroid hormone receptor alpha                               | -1.534849003 | 0.037602552 |
| ENSSSCT00000059894.1 | NOP58 ribonucleoprotein                                      | -1.479593493 | 0.012833619 |
| ENSSSCT00000005130.3 | GA binding protein transcription factor subunit beta 1       | -1.471669624 | 0.025680311 |
| ENSSSCT00000005185.3 | WD repeat domain 76                                          | -1.45035634  | 0.02280728  |
| ENSSSCT00000057182.1 | TNF receptor superfamily member 4                            | -1.449810613 | 0.014566984 |
| ENSSSCT00000005112.3 | LysM domain containing 2                                     | -1.445966265 | 0.04268515  |
| ENSSSCT00000065335.1 | O-6-methylguanine-DNA methyltransferase                      | -1.445292163 | 0.039976214 |
| ENSSSCT00000044950.1 | N/A                                                          | -1.406538552 | 0.034612061 |
| ENSSSCT00000061913.1 | neuronal regeneration related protein                        | -1.294440249 | 0.00319752  |
| ENSSSCT00000066361.1 | ribosomal protein L15                                        | -1.276455575 | 0.018411358 |
| ENSSSCT00000008849.3 | inositol-pentakisphosphate 2-kinase                          | -1.274053208 | 0.035893952 |
| ENSSSCT00000010386.3 | MYC binding protein 2, E3 ubiquitin protein ligase           | -1.269447142 | 0.025478388 |
| ENSSSCT00000034359.2 | CD27 molecule                                                | -1.181666162 | 0.034698578 |

|                      |                                                               |              |             |
|----------------------|---------------------------------------------------------------|--------------|-------------|
| ENSSSCT00000061741.1 | CCR4-NOT transcription complex subunit 2                      | -1.06970357  | 0.021297216 |
| ENSSSCT00000041061.1 | dual specificity tyrosine phosphorylation regulated kinase 1A | -1.058960738 | 0.006764951 |
| ENSSSCT00000000767.2 | CD27 molecule                                                 | -1.056946607 | 0.00259463  |
| ENSSSCT00000064264.1 | mitochondrial transcription termination factor 1              | -1.055870412 | 0.018975659 |
| ENSSSCT00000001560.3 | euchromatic histone lysine methyltransferase 2                | -1.052596992 | 0.022855879 |
| ENSSSCT00000041049.1 | tetraspanin 5                                                 | -1.045469275 | 0.0461556   |
| ENSSSCT00000058408.1 | splicing factor 3b subunit 1                                  | -1.023311139 | 0.030200152 |
| ENSSSCT00000050784.1 | FA complementation group D2                                   | -1.000350595 | 0.028431835 |
| ENSSSCT00000053964.1 | importin 11                                                   | -0.955712799 | 0.039516324 |
| ENSSSCT00000060206.1 | SURF1, cytochrome c oxidase assembly factor                   | -0.940829476 | 0.008521679 |
| ENSSSCT00000036436.2 | cytotoxic T-lymphocyte associated protein 4                   | -0.910269023 | 0.028601332 |
| ENSSSCT00000057503.1 | cold inducible RNA binding protein                            | -0.863268945 | 0.035670232 |
| ENSSSCT00000044338.1 | mitogen-activated protein kinase kinase kinase 4              | -0.845322835 | 0.038491883 |
| ENSSSCT00000022399.2 | lysine rich nucleolar protein 1                               | -0.824858714 | 0.043510511 |
| ENSSSCT00000040898.1 | microtubule-actin crosslinking factor 1                       | -0.798109417 | 0.01934093  |
| ENSSSCT00000045972.1 | phospholipase D family member 3                               | -0.76736448  | 0.037087695 |
| ENSSSCT00000040645.1 | interferon regulatory factor 8                                | -0.748837959 | 0.030383756 |
| ENSSSCT00000029013.2 | RNA binding motif protein 18                                  | -0.734450802 | 0.025033149 |
| ENSSSCT00000052923.1 | nuclear body protein SP140-like protein                       | -0.715121689 | 0.010903301 |
| ENSSSCT00000048725.1 | T cell receptor beta variable 30 (gene/pseudogene)            | -0.704786566 | 0.004083085 |
| ENSSSCT00000018767.3 | tweety family member 2                                        | -0.697099384 | 0.034027196 |
| ENSSSCT00000035758.2 | ubiquitin protein ligase E3 component n-recognin 5            | -0.687676323 | 0.037806198 |
| ENSSSCT00000008081.3 | translocase of outer mitochondrial membrane 34                | -0.670746509 | 0.042075773 |
| ENSSSCT00000014304.3 | cytochrome b561 family member A3                              | -0.647289313 | 0.00881016  |
| ENSSSCT00000030066.2 | adenosine deaminase                                           | -0.646331474 | 0.022868938 |
| ENSSSCT00000063738.1 | transcription factor 3                                        | -0.638789162 | 0.023109493 |
| ENSSSCT00000042072.1 | TBC1 domain family member 10C                                 | -0.633671941 | 0.030256857 |
| ENSSSCT00000018469.3 | RAD17 checkpoint clamp loader component                       | -0.631047387 | 0.016859362 |
| ENSSSCT00000055932.1 | transmembrane protein 11                                      | -0.625290644 | 0.02158401  |

|                      |                                                         |              |             |
|----------------------|---------------------------------------------------------|--------------|-------------|
| ENSSSCT00000052940.1 | CCR4-NOT transcription complex subunit 8                | -0.619616656 | 0.010886306 |
| ENSSSCT00000000750.3 | lymphocyte activating 3                                 | -0.618504424 | 0.049781452 |
| ENSSSCT00000043658.1 | tubulin beta 4B class IVb                               | -0.604107781 | 0.011313731 |
| ENSSSCT00000017944.3 | N/A                                                     | -0.59435051  | 0.004235215 |
| ENSSSCT00000060863.1 | SMU1, DNA replication regulator and spliceosomal factor | -0.589077657 | 0.019440256 |
| ENSSSCT00000017010.3 | hydroxysteroid 11-beta dehydrogenase 1                  | -0.586769508 | 0.048920186 |
| ENSSSCT00000003223.2 | hematopoietic cell signal transducer                    | -0.566119264 | 0.034943612 |
| ENSSSCT00000043336.1 | copine 1                                                | -0.56097322  | 0.047978114 |
| ENSSSCT00000063466.1 | lipin 2                                                 | -0.546998052 | 0.014170445 |
| ENSSSCT00000065676.1 | fibrillarin                                             | -0.519712132 | 0.047613933 |
| ENSSSCT00000008412.3 | POP7 homolog, ribonuclease P/MRP subunit                | -0.515692885 | 0.03190433  |
| ENSSSCT00000050664.1 | proteasome assembly chaperone 3                         | -0.511376159 | 0.039106159 |
| ENSSSCT00000018224.3 | myosin IG                                               | -0.504672345 | 0.048549555 |
| ENSSSCT00000037720.1 | N/A                                                     | -0.497360667 | 0.037542644 |
| ENSSSCT00000048683.1 | GTPase, IMAP family member 6                            | -0.495157949 | 0.009528821 |
| ENSSSCT00000012625.3 | ADP ribosylation factor like GTPase 8B                  | -0.488532357 | 0.031238897 |
| ENSSSCT00000043450.1 | eukaryotic translation initiation factor 3 subunit K    | -0.46669003  | 0.00413691  |
| ENSSSCT00000008748.3 | mitochondrial ribosomal protein L28                     | -0.461708479 | 0.010068575 |
| ENSSSCT00000054928.1 | eukaryotic translation elongation factor 1 alpha 1      | -0.439887378 | 0.031252146 |
| ENSSSCT00000048609.1 | FCF1, rRNA-processing protein                           | -0.437454204 | 0.004550425 |
| ENSSSCT00000054538.1 | ribosomal protein S9                                    | -0.432725296 | 0.018322695 |
| ENSSSCT00000036365.2 | ubiquitously expressed prefoldin like chaperone         | -0.419394093 | 0.007283995 |
| ENSSSCT00000028688.2 | SERTA domain containing 1                               | -0.41703655  | 0.037230804 |
| ENSSSCT00000039677.1 | ribosomal protein L28                                   | -0.413770633 | 0.028878982 |
| ENSSSCT00000045113.1 | selenoprotein W                                         | -0.409936529 | 0.002341962 |
| ENSSSCT00000062407.1 | SUZ RNA binding domain containing 1                     | -0.403216376 | 0.019853827 |
| ENSSSCT00000038751.1 | metallo-beta-lactamase domain containing 1              | -0.400736821 | 0.030389926 |
| ENSSSCT00000049267.1 | eukaryotic translation initiation factor 3 subunit K    | -0.39797562  | 0.007682182 |
| ENSSSCT00000046389.1 | GrpE like 1, mitochondrial                              | -0.396359027 | 0.00107458  |
| ENSSSCT00000044740.1 | transmembrane protein 273                               | -0.393323603 | 0.025017148 |
| ENSSSCT00000044715.1 | glutaredoxin 3                                          | -0.391033313 | 0.020628526 |



|                      |                                                          |              |             |
|----------------------|----------------------------------------------------------|--------------|-------------|
| ENSSSCT00000048452.1 | ribosomal protein L28                                    | -0.382396779 | 0.039971914 |
| ENSSSCT00000052185.1 | cathepsin D                                              | -0.379429826 | 0.023339239 |
| ENSSSCT00000059106.1 | RNA binding motif protein 4                              | -0.37801962  | 0.045763209 |
| ENSSSCT00000048624.1 | ring finger protein 113A                                 | -0.377197345 | 0.032782835 |
| ENSSSCT00000061168.1 | ribosomal protein S2                                     | -0.366684797 | 0.039870068 |
| ENSSSCT00000012340.3 | ribosomal protein L14                                    | -0.361383902 | 0.00031845  |
| ENSSSCT00000029505.2 | PX domain containing 1                                   | -0.356353668 | 0.03478196  |
| ENSSSCT00000056491.1 | ribosomal protein L4                                     | -0.351119746 | 0.015056566 |
| ENSSSCT00000014242.3 | tRNA methyltransferase subunit 11-2                      | -0.348120015 | 0.009094574 |
| ENSSSCT00000064200.1 | ribosomal protein L19                                    | -0.347747544 | 0.015574285 |
| ENSSSCT00000048373.1 | eukaryotic translation initiation factor 5A              | -0.346990551 | 0.015380492 |
| ENSSSCT00000054388.1 | BRCA2 and CDKN1A interacting protein                     | -0.346914607 | 0.033746112 |
| ENSSSCT00000045474.1 | ribosomal protein L10a                                   | -0.346860291 | 0.001255086 |
| ENSSSCT00000064349.1 | RNA polymerase II subunit D                              | -0.345325627 | 0.030774803 |
| ENSSSCT00000048468.1 | solute carrier family 25 member 6                        | -0.341890138 | 0.008967768 |
| ENSSSCT00000025029.2 | NOP53 ribosome biogenesis factor                         | -0.33552327  | 0.006326654 |
| ENSSSCT00000014851.3 | ribosomal protein S28                                    | -0.333313861 | 0.006253158 |
| ENSSSCT00000059130.1 | nuclear body protein SP140-like protein                  | -0.332860853 | 0.035318268 |
| ENSSSCT00000059836.1 | small nuclear ribonucleoprotein D2 polypeptide           | -0.332169712 | 0.049566313 |
| ENSSSCT00000061274.1 | NADH:ubiquinone oxidoreductase complex assembly factor 8 | -0.330542747 | 0.046710607 |
| ENSSSCT00000028682.2 | ribosomal protein L13                                    | -0.328913177 | 0.017097963 |
| ENSSSCT00000031015.3 | ribosomal protein L8                                     | -0.327301379 | 0.027341663 |
| ENSSSCT00000064812.1 | actin related protein 2/3 complex subunit 4              | -0.327266631 | 0.042246532 |
| ENSSSCT00000001675.3 | ribosomal protein S18                                    | -0.322883333 | 0.008225656 |
| ENSSSCT00000044425.1 | dihydrouridine synthase 1 like                           | -0.319153636 | 0.04986722  |
| ENSSSCT00000024892.2 | ribosomal protein S2                                     | -0.315605395 | 0.028723504 |
| ENSSSCT00000044605.1 | hydroxysteroid 11-beta dehydrogenase 1 like              | -0.315134803 | 0.041812024 |
| ENSSSCT00000063010.1 | ribosomal protein L3                                     | -0.311062472 | 0.003414329 |
| ENSSSCT00000004003.3 | LCK proto-oncogene, Src family tyrosine kinase           | -0.309201863 | 0.027082817 |
| ENSSSCT00000044760.1 | ribosomal protein L32                                    | -0.308745926 | 0.018209917 |
| ENSSSCT00000003515.3 | ribosomal protein S11                                    | -0.308050616 | 0.045496793 |
| ENSSSCT00000014280.3 | eukaryotic translation elongation factor 1 gamma         | -0.306982518 | 0.010288993 |
| ENSSSCT00000016207.3 | ribosomal protein S3                                     | -0.303561107 | 0.00178912  |

|                       |                                                      |              |             |
|-----------------------|------------------------------------------------------|--------------|-------------|
| ENSSSCT00000007934.3  | COMM domain containing 7                             | -0.303292416 | 0.041918507 |
| ENSSSCT00000003287.3  | eukaryotic translation initiation factor 3 subunit K | -0.301831875 | 0.008129704 |
| ENSSSCT00000004960.3  | eukaryotic translation elongation factor 1 alpha 1   | -0.301012103 | 0.001097065 |
| ENSSSCT000000049763.1 | ribosomal protein lateral stalk subunit P0           | -0.29006573  | 0.006427998 |
| ENSSSCT000000045427.1 | anaphase promoting complex subunit 11                | -0.285807903 | 0.044409636 |
| ENSSSCT000000029345.2 | UBX domain protein 1                                 | -0.280989372 | 0.009365786 |
| ENSSSCT000000014037.3 | ribosomal protein lateral stalk subunit P2           | -0.278845121 | 0.023961817 |
| ENSSSCT000000041942.1 | ribosomal protein S19                                | -0.273889547 | 0.03719649  |
| ENSSSCT000000015437.3 | ribosomal protein S23                                | -0.27225382  | 0.045699038 |
| ENSSSCT000000066267.1 | U2 small nuclear RNA auxiliary factor 1              | -0.268879344 | 0.017634077 |
| ENSSSCT000000014925.3 | eukaryotic translation initiation factor 3 subunit G | -0.265657041 | 0.030376463 |
| ENSSSCT000000040918.1 | ribosomal protein L5                                 | -0.265597496 | 0.029521428 |
| ENSSSCT000000001720.3 | ribosomal protein L10a                               | -0.26249581  | 0.03248726  |
| ENSSSCT000000052787.1 | eukaryotic translation elongation factor 1 delta     | -0.26018951  | 0.012740554 |
| ENSSSCT000000018679.3 | eukaryotic translation initiation factor 4A3         | -0.253388464 | 0.048564297 |
| ENSSSCT000000005457.3 | ribosomal protein L4                                 | -0.252519378 | 0.015123591 |
| ENSSSCT000000061738.1 | ribosomal protein L18                                | -0.252467063 | 0.044815468 |
| ENSSSCT000000008725.3 | small nuclear ribonucleoprotein U11/U12 subunit 25   | -0.247774692 | 0.023367155 |
| ENSSSCT000000027316.2 | ribosomal protein L29                                | -0.245583248 | 0.025797705 |
| ENSSSCT000000014615.3 | ribosomal protein S13                                | -0.242742242 | 0.022929899 |
| ENSSSCT000000012642.3 | actin related protein 2/3 complex subunit 4          | -0.237900618 | 0.044666642 |
| ENSSSCT000000016669.3 | sorcin                                               | -0.235067559 | 0.03085186  |
| ENSSSCT000000013078.3 | ribosomal protein L24                                | -0.229063233 | 0.004057949 |
| ENSSSCT000000015919.3 | ribosomal protein L27a                               | -0.222205158 | 0.018227443 |
| ENSSSCT000000015001.3 | telomerase RNA component interacting RNase           | -0.2140207   | 0.049415263 |
| ENSSSCT000000043834.1 | ribosomal protein S20                                | -0.213240738 | 0.009725433 |
| ENSSSCT000000006622.3 | eukaryotic translation initiation factor 3 subunit E | -0.210572087 | 0.04223635  |
| ENSSSCT000000011019.3 | small nuclear ribonucleoprotein D3 polypeptide       | -0.205395083 | 0.035395387 |

|                      |                                                         |              |             |
|----------------------|---------------------------------------------------------|--------------|-------------|
| ENSSSCT00000065049.1 | FAU, ubiquitin like and ribosomal protein S30 fusion    | -0.201332495 | 0.027209036 |
| ENSSSCT00000024076.2 | ribosomal protein L26                                   | -0.19982986  | 0.049854546 |
| ENSSSCT00000006146.3 | proteasome subunit beta 7                               | -0.186225711 | 0.043890188 |
| ENSSSCT00000046697.1 | eukaryotic translation initiation factor 3 subunit H    | -0.160579682 | 0.045221272 |
| ENSSSCT00000000090.2 | activating transcription factor 4                       | -0.15098453  | 0.046893499 |
| ENSSSCT00000017252.3 | glutathione-disulfide reductase                         | 0.228069039  | 0.043028459 |
| ENSSSCT00000000975.3 | leukotriene A4 hydrolase                                | 0.249415173  | 0.039710764 |
| ENSSSCT00000026750.2 | ZFP36 ring finger protein                               | 0.249767753  | 0.048166915 |
| ENSSSCT00000018376.3 | 3-hydroxy-3-methylglutaryl-CoA synthase 1               | 0.273484968  | 0.01957876  |
| ENSSSCT00000053892.1 | ADP ribosylation factor 1                               | 0.301933511  | 0.026476638 |
| ENSSSCT00000024166.2 | farnesyl-diphosphate farnesyltransferase 1              | 0.302054013  | 0.020718497 |
| ENSSSCT00000062663.1 | malic enzyme 2                                          | 0.34409655   | 0.042623887 |
| ENSSSCT00000056298.1 | basic helix-loop-helix family member e40                | 0.383593617  | 0.019060614 |
| ENSSSCT00000003473.3 | KDEL endoplasmic reticulum protein retention receptor 1 | 0.386555748  | 0.044682477 |
| ENSSSCT00000056665.1 | parvin alpha                                            | 0.390615534  | 0.048743121 |
| ENSSSCT00000011350.3 | glutamate dehydrogenase 1                               | 0.392163974  | 0.005815942 |
| ENSSSCT00000018974.2 | junction plakoglobin                                    | 0.409097285  | 0.041590549 |
| ENSSSCT00000042242.1 | tumor protein D52                                       | 0.42286583   | 0.021536879 |
| ENSSSCT00000045246.1 | SH3 domain binding glutamate rich protein like 2        | 0.423793266  | 0.037406043 |
| ENSSSCT00000053997.1 | RAS like proto-oncogene B                               | 0.440418268  | 0.006508252 |
| ENSSSCT00000056807.1 | MAX dimerization protein 1                              | 0.442945948  | 0.044731384 |
| ENSSSCT00000056464.1 | dual specificity phosphatase 5                          | 0.44821078   | 0.036577045 |
| ENSSSCT00000050201.1 | acyl-CoA oxidase 1                                      | 0.45740727   | 0.022480224 |
| ENSSSCT00000016766.2 | carnitine O-octanoyltransferase                         | 0.462896089  | 0.047429214 |
| ENSSSCT00000004193.3 | cystathionine gamma-lyase                               | 0.469824567  | 0.026811527 |
| ENSSSCT00000009288.3 | galactose mutarotase                                    | 0.470936308  | 0.014467425 |
| ENSSSCT00000041118.1 | protein kinase C delta                                  | 0.474101922  | 0.049889822 |
| ENSSSCT00000007115.3 | lamin A/C                                               | 0.498710376  | 0.026724367 |
| ENSSSCT00000017880.3 | insulin induced gene 1                                  | 0.499147213  | 0.010739238 |
| ENSSSCT00000041873.1 | zinc finger and BTB domain containing 7B                | 0.50388769   | 0.042467941 |
| ENSSSCT00000052265.1 | erythrocyte membrane protein band 4.1 like 3            | 0.505882467  | 0.04957682  |
| ENSSSCT00000027607.2 | aldehyde dehydrogenase 1 family member A1               | 0.506628256  | 0.011325221 |

|                      |                                                                 |             |             |
|----------------------|-----------------------------------------------------------------|-------------|-------------|
| ENSSSCT00000044681.1 | interleukin 13 receptor subunit alpha 1                         | 0.52215864  | 0.017111338 |
| ENSSSCT00000055492.1 | filamin binding LIM protein 1                                   | 0.52598246  | 0.043158847 |
| ENSSSCT00000017060.3 | complement component 4 binding protein, alpha                   | 0.534284994 | 0.012598024 |
| ENSSSCT00000012958.3 | solute carrier family 51 alpha subunit                          | 0.543047004 | 0.012869432 |
| ENSSSCT00000043928.1 | N/A                                                             | 0.546006946 | 0.029306386 |
| ENSSSCT00000057200.1 | N/A                                                             | 0.564015399 | 0.023775601 |
| ENSSSCT00000007531.3 | sorting nexin 7                                                 | 0.564521597 | 0.046556275 |
| ENSSSCT00000058742.1 | enoyl-CoA hydratase and 3-hydroxyacyl CoA dehydrogenase         | 0.566368513 | 0.049208472 |
| ENSSSCT00000026717.2 | anterior gradient 2, protein disulphide isomerase family member | 0.5687442   | 0.04719697  |
| ENSSSCT00000061552.1 | SOS Ras/Rac guanine nucleotide exchange factor 1                | 0.577627062 | 0.015410144 |
| ENSSSCT00000030773.2 | kelch like family member 7                                      | 0.5789791   | 0.046442273 |
| ENSSSCT00000044810.1 | microtubule associated scaffold protein 1                       | 0.583234871 | 0.032898387 |
| ENSSSCT00000053024.1 | ras-related protein Rap-2a pseudogene                           | 0.594844559 | 0.021533934 |
| ENSSSCT00000037199.1 | dual specificity phosphatase 6                                  | 0.602643778 | 0.009619799 |
| ENSSSCT00000001722.3 | TEA domain transcription factor 3                               | 0.606707967 | 0.033378632 |
| ENSSSCT00000031995.2 | myosin heavy chain 14                                           | 0.608369334 | 0.022346768 |
| ENSSSCT00000060242.1 | N/A                                                             | 0.622131058 | 0.025839191 |
| ENSSSCT00000032098.2 | family with sequence similarity 83 member E                     | 0.626529574 | 0.046255128 |
| ENSSSCT00000003075.3 | hydroxysteroid 11-beta dehydrogenase 2                          | 0.6285727   | 0.026553291 |
| ENSSSCT00000062764.1 | syntaxin binding protein 6                                      | 0.630177872 | 0.005360919 |
| ENSSSCT00000048374.1 |                                                                 | 0.651053344 | 0.000459718 |
| ENSSSCT00000040297.1 | fatty acid binding protein 2                                    | 0.654992496 | 0.044672791 |
| ENSSSCT00000006690.3 | epithelial splicing regulatory protein 1                        | 0.666738637 | 0.039224058 |
| ENSSSCT00000041432.1 | N/A                                                             | 0.671084798 | 0.003375753 |
| ENSSSCT00000007341.3 | flavin containing monooxygenase 5                               | 0.675439465 | 0.042551565 |
| ENSSSCT00000052138.1 | guanosine monophosphate reductase                               | 0.67648381  | 0.029305606 |
| ENSSSCT00000013382.4 | ornithine carbamoyltransferase                                  | 0.678854595 | 0.019270481 |
| ENSSSCT00000029156.2 | family with sequence similarity 3 member D                      | 0.688418873 | 0.021396802 |
| ENSSSCT00000044801.1 | N/A                                                             | 0.699719353 | 0.037924239 |
| ENSSSCT00000040699.1 | phospholipase D1                                                | 0.70106968  | 0.035896185 |

|                      |                                                                      |             |             |
|----------------------|----------------------------------------------------------------------|-------------|-------------|
| ENSSSCT00000045147.1 | protein phosphatase, Mg <sup>2+</sup> /Mn <sup>2+</sup> dependent 1H | 0.713428805 | 0.029271065 |
| ENSSSCT00000018356.3 | complement C9                                                        | 0.729433761 | 0.027853069 |
| ENSSSCT00000010052.3 | microsomal triglyceride transfer protein                             | 0.736458662 | 0.043192467 |
| ENSSSCT00000063809.1 | glycerol-3-phosphate dehydrogenase 2                                 | 0.740554029 | 0.028512158 |
| ENSSSCT00000033582.2 | joining chain of multimeric IgA and IgM                              | 0.742360146 | 0.019224111 |
| ENSSSCT00000035626.2 | alanyl aminopeptidase, membrane                                      | 0.744203698 | 0.026892386 |
| ENSSSCT00000047803.1 | complement component 4 binding protein beta                          | 0.745822862 | 0.021506017 |
| ENSSSCT00000063237.1 | N/A                                                                  | 0.751282838 | 0.014443562 |
| ENSSSCT00000016224.3 | tsukushi, small leucine rich proteoglycan                            | 0.753103364 | 0.011264702 |
| ENSSSCT00000029761.2 | N/A                                                                  | 0.757557891 | 0.002504213 |
| ENSSSCT00000045217.1 | peripheral myelin protein 22                                         | 0.759406347 | 0.027215413 |
| ENSSSCT00000066211.1 | N/A                                                                  | 0.769239159 | 0.047304769 |
| ENSSSCT00000047176.1 | desmocollin 3                                                        | 0.785933144 | 0.017273354 |
| ENSSSCT00000027977.2 | trefoil factor 2                                                     | 0.788243115 | 0.021602008 |
| ENSSSCT00000062230.1 | tight junction protein 2                                             | 0.78872093  | 0.027951294 |
| ENSSSCT00000047623.1 | chloride channel accessory 1                                         | 0.796612119 | 0.022119187 |
| ENSSSCT00000044005.1 | N/A                                                                  | 0.798650358 | 0.0001185   |
| ENSSSCT00000054278.1 | CD46 molecule, complement regulatory protein                         | 0.816204505 | 0.032528643 |
| ENSSSCT00000056923.1 | N/A                                                                  | 0.819251357 | 0.017834667 |
| ENSSSCT00000047974.1 | interferon induced protein 44                                        | 0.831182492 | 0.036912316 |
| ENSSSCT00000063551.1 | N/A                                                                  | 0.832479647 | 0.0281713   |
| ENSSSCT00000045881.1 | chloride intracellular channel 5                                     | 0.83933671  | 0.02949258  |
| ENSSSCT00000052141.1 | solute carrier family 5 member 1                                     | 0.842309411 | 0.037201226 |
| ENSSSCT00000055736.1 | acyl-CoA synthetase long chain family member 3                       | 0.857990312 | 0.04818076  |
| ENSSSCT00000065219.1 | tubulin polymerization promoting protein                             | 0.899671484 | 0.042575931 |
| ENSSSCT00000039153.1 | N/A                                                                  | 0.900723239 | 0.044898055 |
| ENSSSCT00000046834.1 | four and a half LIM domains 2                                        | 0.902361244 | 0.017710037 |
| ENSSSCT00000003832.3 | podoplanin                                                           | 0.902714001 | 0.012745291 |
| ENSSSCT00000000447.3 | myosin IA                                                            | 0.903183814 | 0.029308371 |
| ENSSSCT00000057491.1 | joining chain of multimeric IgA and IgM                              | 0.919984466 | 0.000248301 |
| ENSSSCT00000027766.2 | Fc fragment of IgG binding protein                                   | 0.924706741 | 0.003238298 |

|                      |                                                       |             |             |
|----------------------|-------------------------------------------------------|-------------|-------------|
| ENSSSCT00000002650.3 | Fos proto-oncogene, AP-1 transcription factor subunit | 0.944337622 | 0.000745439 |
| ENSSSCT00000047537.1 | Fc fragment of IgG binding protein                    | 0.959046505 | 0.034806463 |
| ENSSSCT00000060871.1 | joining chain of multimeric IgA and IgM               | 0.995406747 | 0.000104136 |
| ENSSSCT00000049254.1 | nudE neurodevelopment protein 1 like 1                | 1.006770611 | 0.046749833 |
| ENSSSCT00000064583.1 | N/A                                                   | 1.019924379 | 0.012900683 |
| ENSSSCT00000058969.1 | guanosine monophosphate reductase                     | 1.020975407 | 0.036952948 |
| ENSSSCT00000047658.1 | ubiquitin protein ligase E3 component n-recognin 2    | 1.021059766 | 0.048499307 |
| ENSSSCT00000055231.1 | N/A                                                   | 1.039972458 | 0.045817247 |
| ENSSSCT00000059114.1 | spermatogenesis associated 2                          | 1.042826532 | 0.035361058 |
| ENSSSCT00000040369.1 | sorbin and SH3 domain containing 2                    | 1.091974767 | 0.048312663 |
| ENSSSCT00000040290.1 | N/A                                                   | 1.127059856 | 0.0151807   |
| ENSSSCT00000059021.1 | UPF2, regulator of nonsense mediated mRNA decay       | 1.190386416 | 0.02916305  |
| ENSSSCT00000044637.1 | carboxypeptidase O                                    | 1.198948792 | 0.010033733 |
| ENSSSCT00000043799.1 | N/A                                                   | 1.203042507 | 0.01904114  |
| ENSSSCT00000065387.1 | erythrocyte membrane protein band 4.1 like 2          | 1.206953817 | 0.033360419 |
| ENSSSCT00000052491.1 | bactericidal permeability increasing protein          | 1.229461355 | 0.010903429 |
| ENSSSCT00000045493.1 | ubiquitin specific peptidase 32                       | 1.251892925 | 0.02423592  |
| ENSSSCT00000058777.1 | F-box protein 25                                      | 1.253067087 | 0.006058841 |
| ENSSSCT00000014625.3 | cytochrome P450 family 2 subfamily R member 1         | 1.277134606 | 0.011235581 |
| ENSSSCT00000007595.3 | chloride channel accessory 1                          | 1.298638285 | 0.031769943 |
| ENSSSCT00000038671.1 | solute carrier family 22 member 5                     | 1.299272084 | 0.014171183 |
| ENSSSCT00000064491.1 | N/A                                                   | 1.30046266  | 0.019382197 |
| ENSSSCT00000052505.1 | joining chain of multimeric IgA and IgM               | 1.30666671  | 0.010225436 |
| ENSSSCT00000063710.1 | N/A                                                   | 1.329926051 | 0.005996359 |
| ENSSSCT00000043225.1 | bactericidal permeability increasing protein          | 1.334354418 | 0.018338655 |
| ENSSSCT00000015497.3 | peptidylglycine alpha-amidating monooxygenase         | 1.335477224 | 0.011811013 |
| ENSSSCT00000053543.1 | C-C motif chemokine receptor like 2                   | 1.337946917 | 0.005555039 |
| ENSSSCT00000045318.1 | myosin light chain kinase                             | 1.34489206  | 0.017460681 |
| ENSSSCT00000056394.1 | tetratricopeptide repeat domain 23                    | 1.374097335 | 0.047170318 |
| ENSSSCT00000042177.1 | N/A                                                   | 1.39697285  | 0.041958784 |

|                      |                                                                |             |             |
|----------------------|----------------------------------------------------------------|-------------|-------------|
| ENSSSCT00000051608.1 | N/A                                                            | 1.430563486 | 0.016759801 |
| ENSSSCT00000056768.1 | chromodomain helicase DNA binding protein 8                    | 1.47620019  | 0.004074383 |
| ENSSSCT00000055882.1 | slingshot protein phosphatase 1                                | 1.533796192 | 0.048694719 |
| ENSSSCT00000010413.3 | N/A                                                            | 1.689959012 | 0.021009748 |
| ENSSSCT00000045907.1 | Rho/Rac guanine nucleotide exchange factor 2                   | 1.745901673 | 0.020679246 |
| ENSSSCT00000064141.1 | DnaJ heat shock protein family (Hsp40) member C6               | 1.803558093 | 0.042643296 |
| ENSSSCT00000050440.1 | microsomal glutathione S-transferase 3                         | 1.857675518 | 0.047748826 |
| ENSSSCT00000012603.3 | eukaryotic translation initiation factor 4E family member 3    | 1.865355431 | 0.040279106 |
| ENSSSCT00000039326.1 | calponin 1                                                     | 1.936781763 | 0.016721074 |
| ENSSSCT00000039359.1 | solute carrier family 8 member A1                              | 1.949080555 | 0.01633535  |
| ENSSSCT00000018449.3 | ring finger protein 180                                        | 1.989673061 | 0.031291852 |
| ENSSSCT00000038274.1 | biotinidase                                                    | 1.997276394 | 0.005449842 |
| ENSSSCT00000050120.1 | chromosome 11 open reading frame 74                            | 2.008503383 | 0.021134517 |
| ENSSSCT00000059327.1 | endoplasmic reticulum to nucleus signaling 2                   | 2.048283023 | 0.045395869 |
| ENSSSCT00000064256.1 | Rho/Rac guanine nucleotide exchange factor 2                   | 2.057061738 | 0.041736847 |
| ENSSSCT00000050656.1 | kizuna centrosomal protein                                     | 2.181235801 | 0.028981269 |
| ENSSSCT00000025055.2 | aquaporin 8                                                    | 2.206333179 | 0.046091514 |
| ENSSSCT00000044500.1 | cordon-bleu WH2 repeat protein like 1                          | 2.232628197 | 0.037869611 |
| ENSSSCT00000066304.1 | zinc finger FYVE-type containing 1                             | 2.258667338 | 0.03915558  |
| ENSSSCT00000047067.1 | thyroid hormone receptor alpha                                 | 2.285011402 | 0.002745122 |
| ENSSSCT00000054330.1 | transmembrane protein 150A                                     | 2.354042851 | 0.020546322 |
| ENSSSCT00000004585.3 | NHS like 1                                                     | 2.439189384 | 0.014560763 |
| ENSSSCT00000053777.1 | ATPase phospholipid transporting 11B (putative)                | 2.464333431 | 0.030334722 |
| ENSSSCT00000044688.1 | OCIA domain containing 2                                       | 2.473570602 | 0.04668636  |
| ENSSSCT00000048631.1 | B cell CLL/lymphoma 9                                          | 2.486256172 | 0.033295044 |
| ENSSSCT00000047493.1 | nodal modulator 1                                              | 2.520530438 | 0.011909324 |
| ENSSSCT00000066110.1 | sperm antigen with calponin homology and coiled-coil domains 1 | 2.560546363 | 0.012158755 |
| ENSSSCT00000032648.2 | midline 1                                                      | 2.784179005 | 0.006974374 |
| ENSSSCT00000033983.2 | integrator complex subunit 6 like                              | 2.907261453 | 0.009317518 |
| ENSSSCT00000031974.2 | metallothionein-1E-like                                        | 3.570081257 | 0.039755088 |
| ENSSSCT00000041081.1 | N/A                                                            | 3.575680262 | 0.021999837 |

|                      |                                  |             |             |
|----------------------|----------------------------------|-------------|-------------|
| ENSSSCT00000030537.2 | histone H4                       | 3.649738452 | 0.027355311 |
| ENSSSCT00000065870.1 | N/A                              | 3.791101458 | 0.00720061  |
| ENSSSCT00000043706.1 | phosphofructokinase, muscle      | 3.891504668 | 0.003391823 |
| ENSSSCT00000039549.1 | tetraspanin 5                    | 3.906028911 | 0.005199685 |
| ENSSSCT00000009797.3 | solute carrier family 4 member 4 | 4.03921352  | 0.014906521 |
| ENSSSCT00000044624.1 | N/A                              | 4.273336318 | 0.00280932  |
| ENSSSCT00000063767.1 | N/A                              | 4.820942794 | 0.031046776 |



**Supplementary Table S4. Genes related to transporter activity**

| <b>ID</b>           | <b>Log2 fold change</b> | <b>p-value</b> | <b>Gene Name</b>                                                    | <b>Panther Family</b>                                                 |
|---------------------|-------------------------|----------------|---------------------------------------------------------------------|-----------------------------------------------------------------------|
| <b>Zn50 vs LQ50</b> |                         |                |                                                                     |                                                                       |
| ENSSSCT00000010090  | -3.2878                 | 0.0012         | Uncharacterized protein;LOC110255210;ortholog                       | ATP-BINDING CASSETTE SUB-FAMILY G MEMBER 2 (PTHR19241:SF311)          |
| ENSSSCT00000055096  | -2.8582                 | 0.0244         | XK-related protein;XKR9;ortholog                                    | XK-RELATED PROTEIN 9 (PTHR16024:SF13)                                 |
| ENSSSCT00000037785  | -2.1417                 | 0.0210         | Sortilin related VPS10 domain containing receptor 2;SORCS2;ortholog | VPS10 DOMAIN-CONTAINING RECEPTOR SORCS2 (PTHR12106:SF9)               |
| ENSSSCT00000054913  | -1.9534                 | 0.0041         | Solute carrier family 12 member 6;SLC12A6;ortholog                  | SOLUTE CARRIER FAMILY 12 MEMBER 6 (PTHR11827:SF66)                    |
| ENSSSCT00000061852  | -1.6591                 | 0.0144         | Apolipoprotein A-IV;APOA4;ortholog                                  | APOLIPOPROTEIN A-IV (PTHR18976:SF1)                                   |
| ENSSSCT00000048959  | -1.2807                 | 0.0470         | Transmembrane channel-like protein;TMC5;ortholog                    | TRANSMEMBRANE CHANNEL-LIKE PROTEIN 5 (PTHR23302:SF5)                  |
| ENSSSCT00000024216  | -0.4776                 | 0.0297         | Solute carrier family 43 member 2;SLC43A2;ortholog                  | LARGE NEUTRAL AMINO ACIDS TRANSPORTER SMALL SUBUNIT 4 (PTHR20766:SF2) |
| ENSSSCT00000022886  | -0.3637                 | 0.0037         | Phosphatidylinositol transfer protein alpha;PITPNA;ortholog         | PHOSPHATIDYLINOSITOL TRANSFER PROTEIN ALPHA ISOFORM (PTHR10658:SF28)  |
| ENSSSCT00000019677  | 0.6836                  | 0.0420         | Cytochrome c oxidase subunit 3;MT-CO3;ortholog                      | CYTOCHROME C OXIDASE SUBUNIT 3 (PTHR11403:SF7)                        |
| ENSSSCT00000006801  | 0.7319                  | 0.0360         | Non-specific serine/threonine protein kinase;SGK3;ortholog          | SERINE/THREONINE-PROTEIN KINASE SGK3 (PTHR24356:SF121)                |
| ENSSSCT00000058817  | 1.2132                  | 0.0443         | Gap junction protein;GJB3;ortholog                                  | GAP JUNCTION BETA-3 PROTEIN (PTHR11984:SF65)                          |
|                     |                         |                |                                                                     |                                                                       |

**Supplementary Table S5. Genes related to binding proteins**

| <b>ID</b>             | <b>Log2 Fold Change</b> | <b>p-value</b> | <b>Gene Name</b>                                                             | <b>Panther Family</b>                                                        |
|-----------------------|-------------------------|----------------|------------------------------------------------------------------------------|------------------------------------------------------------------------------|
| <b>Zn100 vs LQ100</b> |                         |                |                                                                              |                                                                              |
| ENSSSCT0000003882     | -24.1839                | 0.0000         | Phospholipase A(2);PLA2G2A;ortholog                                          | PHOSPHOLIPASE A2, MEMBRANE ASSOCIATED (PTHR11716:SF9)                        |
| ENSSSCT0000040161     | -2.8331                 | 0.0091         | Regulatory factor X7;RFX7;ortholog                                           | DNA-BINDING PROTEIN RFX7 (PTHR12619:SF2)                                     |
| ENSSSCT0000012564     | -2.3531                 | 0.0393         | Chromosome 3 open reading frame 67;C3orf67;ortholog                          | ZGC:162324 (PTHR12458:SF7)                                                   |
| ENSSSCT0000009621     | -2.2504                 | 0.0227         | Rho-related GTP-binding protein RhoH;RHOH;ortholog                           | RHO-RELATED GTP-BINDING PROTEIN RHOH (PTHR24072:SF163)                       |
| ENSSSCT0000049484     | -2.2021                 | 0.0236         | Protein S100-G;S100G;ortholog                                                | PROTEIN S100-G (PTHR11639:SF73)                                              |
| ENSSSCT0000042792     | -2.1407                 | 0.0316         | Phosphatidylinositol transfer protein membrane associated 2;PITPNM2;ortholog | MEMBRANE-ASSOCIATED PHOSPHATIDYLINOSITOL TRANSFER PROTEIN 2 (PTHR10658:SF41) |
| ENSSSCT0000055045     | -1.9231                 | 0.0475         | TBC1 domain family member 7;TBC1D7;ortholog                                  | TBC1 DOMAIN FAMILY MEMBER 7 (PTHR13530:SF3)                                  |
| ENSSSCT0000066361     | -1.2765                 | 0.0184         | Ribosomal protein L15;RPL15;ortholog                                         | SUBFAMILY NOT NAMED (PTHR11847:SF20)                                         |
| ENSSSCT0000000767     | -1.0569                 | 0.0026         | CD27 antigen precursor;CD27;ortholog                                         | CD27 ANTIGEN (PTHR47496:SF1)                                                 |
| ENSSSCT0000050784     | -1.0004                 | 0.0284         | Fanconi anemia complementation group D2;FANCD2;ortholog                      | FANCONI ANEMIA GROUP D2 PROTEIN (PTHR32086:SF0)                              |
| ENSSSCT0000057503     | -0.8633                 | 0.0357         | Cold-inducible RNA-binding protein;CIRBP;ortholog                            | COLD-INDUCIBLE RNA-BINDING PROTEIN (PTHR15241:SF45)                          |
| ENSSSCT0000040645     | -0.7488                 | 0.0304         | Interferon regulatory factor 8;IRF8;ortholog                                 | INTERFERON REGULATORY FACTOR 8 (PTHR11949:SF7)                               |
| ENSSSCT0000063738     | -0.6388                 | 0.0231         | Transcription factor 3;TCF3;ortholog                                         | TRANSCRIPTION FACTOR E2-ALPHA (PTHR11793:SF7)                                |
| ENSSSCT0000043658     | -0.6041                 | 0.0113         | Tubulin beta chain;TUBB4B;ortholog                                           | TUBULIN BETA-4B CHAIN (PTHR11588:SF247)                                      |
| ENSSSCT0000043336     | -0.5610                 | 0.0480         | Copine-1;CPNE1;ortholog                                                      | COPINE-1 (PTHR10857:SF2)                                                     |

|                        |         |        |                                                                              |                                                                            |
|------------------------|---------|--------|------------------------------------------------------------------------------|----------------------------------------------------------------------------|
| ENSSSCT00<br>000054538 | -0.4327 | 0.0183 | 40S ribosomal<br>protein<br>S9;RPS9;ortholog                                 | 40S RIBOSOMAL PROTEIN S9<br>(PTHR11831:SF5)                                |
| ENSSSCT00<br>000036365 | -0.4194 | 0.0073 | Ubiquitously<br>expressed prefoldin<br>like<br>chaperone;UXT;ortholog        | PROTEIN UXT (PTHR13345:SF4)                                                |
| ENSSSCT00<br>000028688 | -0.4170 | 0.0372 | SERTA domain<br>containing<br>1;SERTAD1;ortholog                             | SERTA DOMAIN-CONTAINING<br>PROTEIN 1 (PTHR16277:SF12)                      |
| ENSSSCT00<br>000046389 | -0.3964 | 0.0011 | GrpE protein<br>homolog;GRPEL1;ortholog                                      | GRPE PROTEIN HOMOLOG 1,<br>MITOCHONDRIAL (PTHR21237:SF25)                  |
| ENSSSCT00<br>000059106 | -0.3780 | 0.0458 | RNA-binding protein<br>4;RBM4;ortholog                                       | RNA-BINDING PROTEIN 4<br>(PTHR23147:SF80)                                  |
| ENSSSCT00<br>000048373 | -0.3470 | 0.0154 | Eukaryotic<br>translation initiation<br>factor<br>5A;EIF5A;ortholog          | EUKARYOTIC TRANSLATION<br>INITIATION FACTOR 5A-1<br>(PTHR11673:SF34)       |
| ENSSSCT00<br>000054388 | -0.3469 | 0.0337 | BRCA2 and<br>CDKN1A-interacting<br>protein;BCCIP;ortholog                    | BRCA2 AND CDKN1A-<br>INTERACTING PROTEIN<br>(PTHR13261:SF0)                |
| ENSSSCT00<br>000045474 | -0.3469 | 0.0013 | Ribosomal<br>protein;RPL10A;ortholog                                         | 60S RIBOSOMAL PROTEIN L10A<br>(PTHR23105:SF107)                            |
| ENSSSCT00<br>000064349 | -0.3453 | 0.0308 | RNA polymerase II<br>subunit<br>D;POLR2D;ortholog                            | DNA-DIRECTED RNA POLYMERASE<br>II SUBUNIT RPB4 (PTHR21297:SF0)             |
| ENSSSCT00<br>000025029 | -0.3355 | 0.0063 | Ribosome biogenesis<br>protein<br>NOP53;NOP53;ortholog                       | RIBOSOME BIOGENESIS PROTEIN<br>NOP53 (PTHR14211:SF7)                       |
| ENSSSCT00<br>000016207 | -0.3036 | 0.0018 | 40S ribosomal<br>protein<br>S3;RPS3;ortholog                                 | 40S RIBOSOMAL PROTEIN S3<br>(PTHR11760:SF32)                               |
| ENSSSCT00<br>000003287 | -0.3018 | 0.0081 | Eukaryotic<br>translation initiation<br>factor 3 subunit<br>K;EIF3K;ortholog | EUKARYOTIC TRANSLATION<br>INITIATION FACTOR 3 SUBUNIT K<br>(PTHR13022:SF0) |
| ENSSSCT00<br>000049763 | -0.2901 | 0.0064 | 60S acidic ribosomal<br>protein<br>P0;RPLP0;ortholog                         | 60S ACIDIC RIBOSOMAL PROTEIN<br>P0-RELATED (PTHR45699:SF1)                 |
| ENSSSCT00<br>000045427 | -0.2858 | 0.0444 | Uncharacterized<br>protein;ANAPC11;ortholog                                  | ANAPHASE-PROMOTING COMPLEX<br>SUBUNIT 11 (PTHR11210:SF1)                   |
| ENSSSCT00<br>000014925 | -0.2657 | 0.0304 | Eukaryotic<br>translation initiation<br>factor 3 subunit<br>G;EIF3G;ortholog | EUKARYOTIC TRANSLATION<br>INITIATION FACTOR 3 SUBUNIT G<br>(PTHR10352:SF0) |
| ENSSSCT00<br>000040918 | -0.2656 | 0.0295 | 60S ribosomal<br>protein<br>L5;RPL5;ortholog                                 | 60S RIBOSOMAL PROTEIN L5<br>(PTHR23410:SF12)                               |

|                        |         |        |                                                                              |                                                                            |
|------------------------|---------|--------|------------------------------------------------------------------------------|----------------------------------------------------------------------------|
| ENSSSCT00<br>000014615 | -0.2427 | 0.0229 | 40S ribosomal<br>protein<br>S13;RPS13;ortholog                               | 40S RIBOSOMAL PROTEIN S13<br>(PTHR11885:SF14)                              |
| ENSSSCT00<br>000006622 | -0.2106 | 0.0422 | Eukaryotic<br>translation initiation<br>factor 3 subunit<br>E;EIF3E;ortholog | EUKARYOTIC TRANSLATION<br>INITIATION FACTOR 3 SUBUNIT E<br>(PTHR10317:SF0) |
| ENSSSCT00<br>000011019 | -0.2054 | 0.0354 | Small nuclear<br>ribonucleoprotein Sm<br>D3;SNRPD3;ortholo<br>g              | SMALL NUCLEAR<br>RIBONUCLEOPROTEIN SM D3<br>(PTHR23338:SF17)               |
| ENSSSCT00<br>000024076 | -0.1998 | 0.0499 | 60S ribosomal<br>protein<br>L26;RPL26;ortholog                               | 60S RIBOSOMAL PROTEIN L26<br>(PTHR11143:SF11)                              |
| ENSSSCT00<br>000046697 | -0.1606 | 0.0452 | Eukaryotic<br>translation initiation<br>factor 3 subunit<br>H;EIF3H;ortholog | EUKARYOTIC TRANSLATION<br>INITIATION FACTOR 3 SUBUNIT H<br>(PTHR10410:SF3) |
| ENSSSCT00<br>000000090 | -0.1510 | 0.0469 | Cyclic AMP-<br>dependent<br>transcription factor<br>ATF-<br>4;ATF4;ortholog  | CYCLIC AMP-DEPENDENT<br>TRANSCRIPTION FACTOR ATF-4<br>(PTHR13044:SF2)      |
| ENSSSCT00<br>000017252 | 0.2281  | 0.0430 | Glutathione<br>reductase;GSR;orthol<br>og                                    | GLUTATHIONE REDUCTASE,<br>MITOCHONDRIAL (PTHR42737:SF2)                    |
| ENSSSCT00<br>000026750 | 0.2498  | 0.0482 | Tristetraprolin;ZFP36<br>;ortholog                                           | MRNA DECAY ACTIVATOR<br>PROTEIN ZFP36 (PTHR12547:SF122)                    |
| ENSSSCT00<br>000053892 | 0.3019  | 0.0265 | ADP-ribosylation<br>factor<br>1;ARF1;ortholog                                | ADP-RIBOSYLATION FACTOR 1<br>(PTHR11711:SF350)                             |
| ENSSSCT00<br>000056298 | 0.3836  | 0.0191 | Class E basic helix-<br>loop-helix protein<br>40;BHLHE40;ortholo<br>g        | CLASS E BASIC HELIX-LOOP-HELIX<br>PROTEIN 40 (PTHR10985:SF3)               |
| ENSSSCT00<br>000056665 | 0.3906  | 0.0487 | Parvin<br>alpha;PARVA;orthol<br>og                                           | ALPHA-PARVIN (PTHR12114:SF6)                                               |
| ENSSSCT00<br>000018974 | 0.4091  | 0.0416 | Junction<br>plakoglobin;JUP;orth<br>olog                                     | JUNCTION PLAKOGLOBIN<br>(PTHR45976:SF3)                                    |
| ENSSSCT00<br>000053997 | 0.4404  | 0.0065 | RAS like proto-<br>oncogene<br>B;RALB;ortholog                               | RAS-RELATED PROTEIN RAL-B<br>(PTHR24070:SF199)                             |
| ENSSSCT00<br>000056807 | 0.4429  | 0.0447 | MAX dimerization<br>protein<br>1;MXD1;ortholog                               | MAX DIMERIZATION PROTEIN 1<br>(PTHR11969:SF18)                             |
| ENSSSCT00<br>000004193 | 0.4698  | 0.0268 | Cystathionine<br>gamma-<br>lyase;CTH;ortholog                                | CYSTATHIONINE GAMMA-LYASE<br>(PTHR11808:SF15)                              |
| ENSSSCT00<br>000044681 | 0.5222  | 0.0171 | Interleukin 13<br>receptor, alpha<br>1;IL13RA1;ortholog                      | INTERLEUKIN-13 RECEPTOR<br>SUBUNIT ALPHA-1<br>(PTHR23036:SF89)             |

|                        |         |        |                                                                              |                                                                             |
|------------------------|---------|--------|------------------------------------------------------------------------------|-----------------------------------------------------------------------------|
| ENSSSCT00<br>000053024 | 0.5948  | 0.0215 | Uncharacterized<br>protein;unassigned;or<br>tholog                           | GENE MODEL 266, (NCBI)<br>(PTHR24070:SF154)                                 |
| ENSSSCT00<br>000001722 | 0.6067  | 0.0334 | Transcriptional<br>enhancer factor TEF-<br>5;TEAD3;ortholog                  | TRANSCRIPTIONAL ENHANCER<br>FACTOR TEF-5 (PTHR11834:SF0)                    |
| ENSSSCT00<br>000044801 | 0.6997  | 0.0379 | Uncharacterized<br>protein;unassigned;or<br>tholog                           | IMMUNOGLOBULIN HEAVY<br>VARIABLE 3-11-RELATED<br>(PTHR23266:SF204)          |
| ENSSSCT00<br>000035626 | 0.7442  | 0.0269 | Aminopeptidase;AN<br>PEP;ortholog                                            | AMINOPEPTIDASE N<br>(PTHR11533:SF172)                                       |
| ENSSSCT00<br>000066211 | 0.7692  | 0.0473 | Uncharacterized<br>protein;unassigned;or<br>tholog                           | PROTEIN HOOK HOMOLOG 3<br>(PTHR18947:SF38)                                  |
| ENSSSCT00<br>000063551 | 0.8325  | 0.0282 | Uncharacterized<br>protein;unassigned;or<br>tholog                           | IMMUNOGLOBULIN HEAVY<br>VARIABLE 3-11-RELATED<br>(PTHR23266:SF204)          |
| ENSSSCT00<br>000065219 | 0.8997  | 0.0426 | Tubulin<br>polymerization<br>promoting protein<br>p25<br>alpha;TPPP;ortholog | TUBULIN POLYMERIZATION-<br>PROMOTING PROTEIN<br>(PTHR12932:SF18)            |
| ENSSSCT00<br>000002650 | 0.9443  | 0.0007 | Proto-oncogene c-<br>Fos;FOS;ortholog                                        | PROTO-ONCOGENE C-FOS<br>(PTHR23351:SF4)                                     |
| ENSSSCT00<br>000049254 | 1.0068  | 0.0467 | Nuclear distribution<br>protein nudE-like<br>1;NDEL1;ortholog                | NUCLEAR DISTRIBUTION PROTEIN<br>NUDE-LIKE 1 (PTHR10921:SF0)                 |
| ENSSSCT00<br>000014625 | 1.2771  | 0.0112 | Cytochrome P450<br>family 2 subfamily R<br>member<br>1;CYP2R1;ortholog       | VITAMIN D 25-HYDROXYLASE<br>(PTHR24300:SF48)                                |
| ENSSSCT00<br>000053543 | 1.3379  | 0.0056 | Chemokine C-C<br>motif receptor-like<br>2;CCRL2;ortholog                     | C-C CHEMOKINE RECEPTOR-LIKE 2<br>(PTHR10489:SF655)                          |
| ENSSSCT00<br>000056394 | 1.3741  | 0.0472 | Tetratricopeptide<br>repeat domain<br>23;TTC23;ortholog                      | TETRATRICOPEPTIDE REPEAT<br>PROTEIN 23 (PTHR14485:SF3)                      |
| ENSSSCT00<br>000055882 | 1.5338  | 0.0487 | Slingshot protein<br>phosphatase<br>1;SSH1;ortholog                          | PROTEIN PHOSPHATASE<br>SLINGSHOT HOMOLOG 1<br>(PTHR45864:SF5)               |
| ENSSSCT00<br>000018449 | 1.9897  | 0.0313 | Ring finger protein<br>180;RNF180;ortholo<br>g                               | E3 UBIQUITIN-PROTEIN LIGASE<br>RNF180 (PTHR46717:SF1)                       |
| ENSSSCT00<br>000031974 | 3.5701  | 0.0398 | Metallothionein-<br>1A;MT1A;ortholog                                         | METALLOTHIONEIN-1A<br>(PTHR23299:SF22)                                      |
| ENSSSCT00<br>000030537 | 3.6497  | 0.0274 | Histone<br>H4;unassigned;orthol<br>og                                        | HISTONE H4 (PTHR10484:SF163)                                                |
| <b>Zn50 vs LQ50</b>    |         |        |                                                                              |                                                                             |
| ENSSSCT00<br>000015136 | -2.7016 | 0.0041 | Epidermal growth<br>factor receptor<br>pathway substrate 15                  | EPIDERMAL GROWTH FACTOR<br>RECEPTOR SUBSTRATE 15-LIKE 1<br>(PTHR11216:SF69) |

|                        |         |        |                                                                                                            |                                                                                                             |
|------------------------|---------|--------|------------------------------------------------------------------------------------------------------------|-------------------------------------------------------------------------------------------------------------|
|                        |         |        | like<br>1;EPS15L1;ortholog                                                                                 |                                                                                                             |
| ENSSSCT00<br>000061466 | -2.5828 | 0.0113 | Transcription<br>elongation factor A<br>N-terminal and<br>central domain<br>containing;TCEANC;<br>ortholog | TRANSCRIPTION ELONGATION<br>FACTOR A N-TERMINAL AND<br>CENTRAL DOMAIN-CONTAINING<br>PROTEIN (PTHR11477:SF7) |
| ENSSSCT00<br>000035464 | -2.5588 | 0.0028 | Uncharacterized<br>protein;LOC1005233<br>10;ortholog                                                       | GUANYLATE-BINDING PROTEIN 6<br>(PTHR10751:SF62)                                                             |
| ENSSSCT00<br>000057064 | -2.2298 | 0.0277 | Polyhomeotic<br>homolog<br>3;PHC3;ortholog                                                                 | POLYHOMEOTIC-LIKE PROTEIN 3<br>(PTHR12247:SF88)                                                             |
| ENSSSCT00<br>000037785 | -2.1417 | 0.0210 | Sortilin related<br>VPS10 domain<br>containing receptor<br>2;SORCS2;ortholog                               | VPS10 DOMAIN-CONTAINING<br>RECEPTOR SORCS2 (PTHR12106:SF9)                                                  |
| ENSSSCT00<br>000039871 | -2.0942 | 0.0332 | Uncharacterized<br>protein;unassigned;or<br>tholog                                                         | IMMUNOGLOBULIN HEAVY<br>VARIABLE 3-11-RELATED<br>(PTHR23266:SF204)                                          |
| ENSSSCT00<br>000059075 | -1.8025 | 0.0209 | Uncharacterized<br>protein;unassigned;or<br>tholog                                                         | IMMUNOGLOBULIN HEAVY<br>VARIABLE 3-11-RELATED<br>(PTHR23266:SF204)                                          |
| ENSSSCT00<br>000061852 | -1.6591 | 0.0144 | Apolipoprotein A-<br>IV;APOA4;ortholog                                                                     | APOLIPOPROTEIN A-IV<br>(PTHR18976:SF1)                                                                      |
| ENSSSCT00<br>000008980 | -1.5834 | 0.0283 | VIP36-like protein<br>precursor;LMAN2L;<br>ortholog                                                        | VIP36-LIKE PROTEIN<br>(PTHR12223:SF20)                                                                      |
| ENSSSCT00<br>000029033 | -1.5750 | 0.0224 | Synaptotagmin<br>12;SYT12;ortholog                                                                         | SYNAPTOTAGMIN-12<br>(PTHR10024:SF252)                                                                       |
| ENSSSCT00<br>000052291 | -1.4563 | 0.0478 | Centromere protein<br>O;CENPO;ortholog                                                                     | CENTROMERE PROTEIN O<br>(PTHR14582:SF1)                                                                     |
| ENSSSCT00<br>000043753 | -1.2366 | 0.0071 | SPT2 chromatin<br>protein domain<br>containing<br>1;SPTY2D1;ortholog                                       | PROTEIN SPT2 HOMOLOG<br>(PTHR22691:SF8)                                                                     |
| ENSSSCT00<br>000062032 | -1.2090 | 0.0395 | Semaphorin<br>4B;SEMA4B;ortholo<br>g                                                                       | SEMAPHORIN-4B (PTHR11036:SF14)                                                                              |
| ENSSSCT00<br>000064480 | -1.1998 | 0.0459 | Transcription<br>elongation regulator<br>1;TCERG1;ortholog                                                 | TRANSCRIPTION ELONGATION<br>REGULATOR 1 (PTHR15377:SF7)                                                     |
| ENSSSCT00<br>000037353 | -1.1398 | 0.0007 | Uncharacterized<br>protein;unassigned;or<br>tholog                                                         | IMMUNOGLOBULIN KAPPA<br>CONSTANT (PTHR23266:SF79)                                                           |
| ENSSSCT00<br>000002141 | -1.1070 | 0.0055 | Promyelocytic<br>leukemia;PML;orthol<br>og                                                                 | PROTEIN PML (PTHR25462:SF241)                                                                               |
| ENSSSCT00<br>000056748 | -1.0832 | 0.0016 | Galectin;LGALS9;ort<br>holog                                                                               | GALECTIN-9 (PTHR11346:SF80)                                                                                 |
| ENSSSCT00<br>000065175 | -1.0825 | 0.0135 | Uncharacterized<br>protein;unassigned;or<br>tholog                                                         | GOLGI PHOSPHOPROTEIN 3<br>(PTHR12704:SF3)                                                                   |

|                        |         |        |                                                                             |                                                                                    |
|------------------------|---------|--------|-----------------------------------------------------------------------------|------------------------------------------------------------------------------------|
| ENSSSCT00<br>000002555 | -1.0094 | 0.0108 | Arginase;ARG2;ortholog                                                      | ARGINASE-2, MITOCHONDRIAL (PTHR43782:SF4)                                          |
| ENSSSCT00<br>000031638 | -0.9830 | 0.0114 | Uncharacterized protein;KDM4A;ortholog                                      | LYSINE-SPECIFIC DEMETHYLASE 4A (PTHR10694:SF32)                                    |
| ENSSSCT00<br>000001595 | -0.8511 | 0.0173 | Novel protein similar to butyrophilin family proteins;LOC100512174;ortholog | BUTYROPHILIN, SUBFAMILY 3, MEMBER A3-RELATED (PTHR24100:SF64)                      |
| ENSSSCT00<br>000041931 | -0.8153 | 0.0236 | Uncharacterized protein;unassigned;ortholog                                 | IMMUNOGLOBULIN HEAVY VARIABLE 3-11-RELATED (PTHR23266:SF204)                       |
| ENSSSCT00<br>000035232 | -0.7662 | 0.0223 | Interferon regulatory factor 7;Irf7;ortholog                                | INTERFERON REGULATORY FACTOR 7 (PTHR11949:SF2)                                     |
| ENSSSCT00<br>000014648 | -0.7431 | 0.0395 | ADM;ADM;ortholog                                                            | ADM (PTHR23414:SF3)                                                                |
| ENSSSCT00<br>000025376 | -0.6591 | 0.0037 | Basic leucine zipper ATF-like transcription factor 2;BATF2;ortholog         | BASIC LEUCINE ZIPPER TRANSCRIPTIONAL FACTOR ATF-LIKE 2 (PTHR23351:SF11)            |
| ENSSSCT00<br>000011756 | -0.6423 | 0.0404 | DEAH-box helicase 32 (putative);DHX32;ortholog                              | PRE-MRNA-SPLICING FACTOR ATP-DEPENDENT RNA HELICASE DHX32-RELATED (PTHR18934:SF88) |
| ENSSSCT00<br>000016571 | -0.6049 | 0.0209 | Hepatic and glial cell adhesion molecule;HEPACAM;ortholog                   | HEPATOCYTE CELL ADHESION MOLECULE (PTHR12080:SF59)                                 |
| ENSSSCT00<br>000024524 | -0.5898 | 0.0076 | Uncharacterized protein;PPP4R1;ortholog                                     | SERINE/THREONINE-PROTEIN PHOSPHATASE 4 REGULATORY SUBUNIT 1 (PTHR10648:SF8)        |
| ENSSSCT00<br>000064525 | -0.4788 | 0.0459 | Arp2/3 complex 34 kDa subunit;ARPC2;ortholog                                | ACTIN-RELATED PROTEIN 2/3 COMPLEX SUBUNIT 2 (PTHR12058:SF0)                        |
| ENSSSCT00<br>000053600 | -0.4219 | 0.0426 | Rho GTPase activating protein 17;ARHGAP17;ortholog                          | RHO GTPASE-ACTIVATING PROTEIN 17 (PTHR14130:SF3)                                   |
| ENSSSCT00<br>000055437 | -0.4102 | 0.0175 | Serine/threonine-protein phosphatase 2A activator;PTPA;ortholog             | SERINE/THREONINE-PROTEIN PHOSPHATASE 2A ACTIVATOR (PTHR10012:SF0)                  |
| ENSSSCT00<br>000022886 | -0.3637 | 0.0037 | Phosphatidylinositol transfer protein alpha;PITPNA;ortholog                 | PHOSPHATIDYLINOSITOL TRANSFER PROTEIN ALPHA ISOFORM (PTHR10658:SF28)               |
| ENSSSCT00<br>000008551 | -0.3458 | 0.0209 | Elongation factor Tu;TUFM;ortholog                                          | ELONGATION FACTOR TU, MITOCHONDRIAL (PTHR43721:SF5)                                |
| ENSSSCT00<br>000044242 | -0.3178 | 0.0164 | Adhesion regulating molecule 1;ADRM1;ortholog                               | PROTEASOMAL UBIQUITIN RECEPTOR ADRM1 (PTHR12225:SF0)                               |

|                        |         |        |                                                                                                                     |                                                                                                            |
|------------------------|---------|--------|---------------------------------------------------------------------------------------------------------------------|------------------------------------------------------------------------------------------------------------|
| ENSSSCT00<br>000042867 | -0.3149 | 0.0418 | Rho GDP<br>dissociation inhibitor<br>alpha;ARHGDIA;ort<br>holog                                                     | RHO GDP-DISSOCIATION<br>INHIBITOR 1 (PTHR10980:SF9)                                                        |
| ENSSSCT00<br>000030514 | -0.2753 | 0.0453 | Serine/threonine-<br>protein phosphatase<br>2A 65 kDa regulatory<br>subunit A alpha<br>isoform;PPP2R1A;or<br>tholog | SERINE/THREONINE-PROTEIN<br>PHOSPHATASE 2A 65 KDA<br>REGULATORY SUBUNIT A ALPHA<br>ISOFORM (PTHR10648:SF2) |
| ENSSSCT00<br>000039540 | -0.2155 | 0.0339 | Ras-related C3<br>botulinum toxin<br>substrate<br>1;RAC1;ortholog                                                   | RAS-RELATED C3 BOTULINUM<br>TOXIN SUBSTRATE 1<br>(PTHR24072:SF105)                                         |
| ENSSSCT00<br>000025147 | 0.4742  | 0.0323 | Histone<br>H2B;HIST1H2BD;or<br>tholog                                                                               | HISTONE H2B TYPE 1-N<br>(PTHR23428:SF170)                                                                  |
| ENSSSCT00<br>000019682 | 0.7948  | 0.0283 | NADH-ubiquinone<br>oxidoreductase chain<br>4;MT-ND4;ortholog                                                        | NADH-UBIQUINONE<br>OXIDOREDUCTASE CHAIN 4<br>(PTHR43507:SF1)                                               |
| ENSSSCT00<br>000005070 | 0.9044  | 0.0346 | Ring finger protein<br>111;RNF111;ortholo<br>g                                                                      | E3 UBIQUITIN-PROTEIN LIGASE<br>ARKADIA (PTHR16200:SF4)                                                     |
| ENSSSCT00<br>000001791 | 0.9390  | 0.0497 | Nuclear transcription<br>factor Y subunit<br>alpha;NFYA;ortholo<br>g                                                | NUCLEAR TRANSCRIPTION<br>FACTOR Y SUBUNIT ALPHA<br>(PTHR12632:SF6)                                         |
| ENSSSCT00<br>000046065 | 1.1418  | 0.0308 | High mobility group<br>protein<br>B1;HMGB1;ortholog                                                                 | SUBFAMILY NOT NAMED<br>(PTHR13711:SF328)                                                                   |
| ENSSSCT00<br>000003507 | 1.2545  | 0.0333 | Protein lin-7<br>homolog;LIN7B;orth<br>olog                                                                         | PROTEIN LIN-7 HOMOLOG B<br>(PTHR14063:SF7)                                                                 |
| ENSSSCT00<br>000032954 | 2.0028  | 0.0331 | Interleukin-<br>33;IL33;ortholog                                                                                    | INTERLEUKIN-33 (PTHR21114:SF0)                                                                             |
| ENSSSCT00<br>000040161 | 2.4144  | 0.0388 | Regulatory factor<br>X7;RFX7;ortholog                                                                               | DNA-BINDING PROTEIN RFX7<br>(PTHR12619:SF2)                                                                |
| ENSSSCT00<br>000013823 | 2.4436  | 0.0158 | Stromal antigen<br>2;STAG2;ortholog                                                                                 | COHESIN SUBUNIT SA-2<br>(PTHR11199:SF3)                                                                    |
|                        |         |        |                                                                                                                     |                                                                                                            |

**Supplementary Table S6. Genes related to catalytic activity**

| ID                     | Log2<br>Fold<br>Change | p-<br>value | Gene Name                              | Panther Family                                              |
|------------------------|------------------------|-------------|----------------------------------------|-------------------------------------------------------------|
| <b>Zn100 vs LQ100</b>  |                        |             |                                        |                                                             |
| ENSSSCT0<br>0000003882 | -<br>24.1839<br>2      | 0.000<br>00 | Phospholipase<br>A(2);PLA2G2A;ortholog | PHOSPHOLIPASE A2,<br>MEMBRANE ASSOCIATED<br>(PTHR11716:SF9) |



|                        |              |             |                                                                           |                                                                            |
|------------------------|--------------|-------------|---------------------------------------------------------------------------|----------------------------------------------------------------------------|
| ENSSSCT0<br>0000012564 | -<br>2.35310 | 0.039<br>30 | Chromosome 3 open<br>reading frame<br>67;C3orf67;ortholog                 | ZGC:162324 (PTHR12458:SF7)                                                 |
| ENSSSCT0<br>0000009621 | -<br>2.25037 | 0.022<br>66 | Rho-related GTP-binding<br>protein<br>RhoH;RHOH;ortholog                  | RHO-RELATED GTP-BINDING<br>PROTEIN RHOH<br>(PTHR24072:SF163)               |
| ENSSSCT0<br>0000055045 | -<br>1.92313 | 0.047<br>46 | TBC1 domain family<br>member<br>7;TBC1D7;ortholog                         | TBC1 DOMAIN FAMILY<br>MEMBER 7 (PTHR13530:SF3)                             |
| ENSSSCT0<br>0000050638 | -<br>1.86996 | 0.046<br>23 | HtrA serine peptidase<br>4;HTRA4;ortholog                                 | SERINE PROTEASE HTRA4<br>(PTHR22939:SF105)                                 |
| ENSSSCT0<br>0000000767 | -<br>1.05695 | 0.002<br>59 | CD27 antigen<br>precursor;CD27;ortholog                                   | CD27 ANTIGEN (PTHR47496:SF1)                                               |
| ENSSSCT0<br>0000060206 | -<br>0.94083 | 0.008<br>52 | SURF1-like<br>protein;SURF1;ortholog                                      | SURFEIT LOCUS PROTEIN 1<br>(PTHR23427:SF2)                                 |
| ENSSSCT0<br>0000014304 | -<br>0.64729 | 0.008<br>81 | Cytochrome b561 family<br>member<br>A3;CYB561A3;ortholog                  | CYTOCHROME B ASCORBATE-<br>DEPENDENT PROTEIN 3<br>(PTHR10106:SF38)         |
| ENSSSCT0<br>0000030066 | -<br>0.64633 | 0.022<br>87 | Adenosine<br>deaminase;ADA;ortholog                                       | ADENOSINE DEAMINASE<br>(PTHR11409:SF43)                                    |
| ENSSSCT0<br>0000052940 | -<br>0.61962 | 0.010<br>89 | CCR4-NOT transcription<br>complex subunit<br>8;CNOT8;ortholog             | CCR4-NOT TRANSCRIPTION<br>COMPLEX SUBUNIT 8<br>(PTHR10797:SF1)             |
| ENSSSCT0<br>0000008412 | -<br>0.51569 | 0.031<br>90 | Ribonuclease P protein<br>subunit p20;POP7;ortholog                       | RIBONUCLEASE P PROTEIN<br>SUBUNIT P20 (PTHR15314:SF1)                      |
| ENSSSCT0<br>0000046389 | -<br>0.39636 | 0.001<br>07 | GrpE protein<br>homolog;GRPEL1;ortholog                                   | GRPE PROTEIN HOMOLOG 1,<br>MITOCHONDRIAL<br>(PTHR21237:SF25)               |
| ENSSSCT0<br>0000052185 | -<br>0.37943 | 0.023<br>34 | Cathepsin<br>D;CTSD;ortholog                                              | CATHEPSIN D (PTHR13683:SF230)                                              |
| ENSSSCT0<br>0000054388 | -<br>0.34691 | 0.033<br>75 | BRCA2 and CDKN1A-<br>interacting<br>protein;BCCIP;ortholog                | BRCA2 AND CDKN1A-<br>INTERACTING PROTEIN<br>(PTHR13261:SF0)                |
| ENSSSCT0<br>0000064349 | -<br>0.34533 | 0.030<br>77 | RNA polymerase II subunit<br>D;POLR2D;ortholog                            | DNA-DIRECTED RNA<br>POLYMERASE II SUBUNIT RPB4<br>(PTHR21297:SF0)          |
| ENSSSCT0<br>0000044425 | -<br>0.31915 | 0.049<br>87 | Dihydrouridine synthase 1<br>like;DUS1L;ortholog                          | TRNA-DIHYDROURIDINE(16/17)<br>SYNTHASE [NAD(P)(+)]-LIKE<br>(PTHR11082:SF5) |
| ENSSSCT0<br>0000016207 | -<br>0.30356 | 0.001<br>79 | 40S ribosomal protein<br>S3;RPS3;ortholog                                 | 40S RIBOSOMAL PROTEIN S3<br>(PTHR11760:SF32)                               |
| ENSSSCT0<br>0000045427 | -<br>0.28581 | 0.044<br>41 | Uncharacterized<br>protein;ANAPC11;ortholog                               | ANAPHASE-PROMOTING<br>COMPLEX SUBUNIT 11<br>(PTHR11210:SF1)                |
| ENSSSCT0<br>0000015001 | -<br>0.21402 | 0.049<br>42 | Telomerase RNA<br>component interacting<br>RNase;TRIR;ortholog            | TELOMERASE RNA COMPONENT<br>INTERACTING RNASE<br>(PTHR34753:SF1)           |
| ENSSSCT0<br>0000006146 | -<br>0.18623 | 0.043<br>89 | Proteasome subunit beta<br>type-7;PSMB7;ortholog                          | PROTEASOME SUBUNIT BETA<br>TYPE-7 (PTHR11599:SF42)                         |
| ENSSSCT0<br>0000046697 | -<br>0.16058 | 0.045<br>22 | Eukaryotic translation<br>initiation factor 3 subunit<br>H;EIF3H;ortholog | EUKARYOTIC TRANSLATION<br>INITIATION FACTOR 3 SUBUNIT<br>H (PTHR10410:SF3) |
| ENSSSCT0<br>0000017252 | -<br>0.22807 | 0.043<br>03 | Glutathione<br>reductase;GSR;ortholog                                     | GLUTATHIONE REDUCTASE,<br>MITOCHONDRIAL<br>(PTHR42737:SF2)                 |

|                        |         |             |                                                                        |                                                                           |
|------------------------|---------|-------------|------------------------------------------------------------------------|---------------------------------------------------------------------------|
| ENSSSCT0<br>0000018376 | 0.27348 | 0.019<br>58 | 3-hydroxy-3-methylglutaryl<br>coenzyme A<br>synthase;HMGCS1;ortholog   | HYDROXYMETHYLGLUTARYL-<br>COA SYNTHASE, CYTOPLASMIC<br>(PTHR43323:SF4)    |
| ENSSSCT0<br>0000011350 | 0.39216 | 0.005<br>82 | Glutamate dehydrogenase<br>1,<br>mitochondrial;GLUD1;ortholog          | GLUTAMATE DEHYDROGENASE<br>1, MITOCHONDRIAL<br>(PTHR11606:SF13)           |
| ENSSSCT0<br>0000053997 | 0.44042 | 0.006<br>51 | RAS like proto-oncogene<br>B;RALB;ortholog                             | RAS-RELATED PROTEIN RAL-B<br>(PTHR24070:SF199)                            |
| ENSSSCT0<br>0000056464 | 0.44821 | 0.036<br>58 | Dual specificity protein<br>phosphatase;DUSP5;ortholog                 | DUAL SPECIFICITY PROTEIN<br>PHOSPHATASE 5<br>(PTHR10159:SF40)             |
| ENSSSCT0<br>0000004193 | 0.46982 | 0.026<br>81 | Cystathionine gamma-<br>lyase;CTH;ortholog                             | CYSTATHIONINE GAMMA-<br>LYASE (PTHR11808:SF15)                            |
| ENSSSCT0<br>0000009288 | 0.47094 | 0.014<br>47 | Aldose 1-<br>epimerase;GALM;ortholog                                   | ALDOSE 1-EPIMERASE<br>(PTHR10091:SF0)                                     |
| ENSSSCT0<br>0000027607 | 0.50663 | 0.011<br>33 | Aldehyde dehydrogenase 1<br>family member<br>A1;ALDH1A1;ortholog       | RETINAL DEHYDROGENASE 1<br>(PTHR11699:SF140)                              |
| ENSSSCT0<br>0000053024 | 0.59484 | 0.021<br>53 | Uncharacterized<br>protein;unassigned;ortholog                         | GENE MODEL 266, (NCBI)<br>(PTHR24070:SF154)                               |
| ENSSSCT0<br>0000037199 | 0.60264 | 0.009<br>62 | Dual specificity protein<br>phosphatase;DUSP6;ortholog                 | DUAL SPECIFICITY PROTEIN<br>PHOSPHATASE 6<br>(PTHR10159:SF45)             |
| ENSSSCT0<br>0000003075 | 0.62857 | 0.026<br>55 | Corticosteroid 11-beta-<br>dehydrogenase isozyme<br>2;HSD11B2;ortholog | CORTICOSTEROID 11-BETA-<br>DEHYDROGENASE ISOZYME 2<br>(PTHR43313:SF2)     |
| ENSSSCT0<br>0000007341 | 0.67544 | 0.042<br>55 | Flavin-containing<br>monooxygenase;FMO5;ortholog                       | DIMETHYLANILINE<br>MONOOXYGENASE [N-OXIDE-<br>FORMING] 5 (PTHR23023:SF78) |
| ENSSSCT0<br>0000013382 | 0.67885 | 0.019<br>27 | Ornithine<br>carbamoyltransferase,<br>mitochondrial;OTC;ortholog       | ORNITHINE<br>CARBAMOYLTRANSFERASE,<br>MITOCHONDRIAL<br>(PTHR45753:SF3)    |
| ENSSSCT0<br>0000045147 | 0.71343 | 0.029<br>27 | Protein phosphatase,<br>Mg2+/Mn2+ dependent<br>1H;PPM1H;ortholog       | PROTEIN PHOSPHATASE 1H<br>(PTHR13832:SF287)                               |
| ENSSSCT0<br>0000035626 | 0.74420 | 0.026<br>89 | Aminopeptidase;ANPEP;ortholog                                          | AMINOPEPTIDASE N<br>(PTHR11533:SF172)                                     |
| ENSSSCT0<br>0000058969 | 1.02098 | 0.036<br>95 | GMP<br>reductase;GMPR;ortholog                                         | GMP REDUCTASE 1<br>(PTHR43170:SF3)                                        |
| ENSSSCT0<br>0000055231 | 1.03997 | 0.045<br>82 | Protein-tyrosine<br>sulfotransferase;unassigned;<br>ortholog           | PROTEIN-TYROSINE<br>SULFOTRANSFERASE 2<br>(PTHR12788:SF6)                 |
| ENSSSCT0<br>0000014625 | 1.27713 | 0.011<br>24 | Cytochrome P450 family 2<br>subfamily R member<br>1;CYP2R1;ortholog    | VITAMIN D 25-HYDROXYLASE<br>(PTHR24300:SF48)                              |
| ENSSSCT0<br>0000050440 | 1.85768 | 0.047<br>75 | Microsomal glutathione S-<br>transferase<br>3;MGST3;ortholog           | MICROSOMAL GLUTATHIONE S-<br>TRANSFERASE 3<br>(PTHR10250:SF17)            |
| ENSSSCT0<br>0000018449 | 1.98967 | 0.031<br>29 | Ring finger protein<br>180;RNF180;ortholog                             | E3 UBIQUITIN-PROTEIN LIGASE<br>RNF180 (PTHR46717:SF1)                     |
|                        |         |             |                                                                        |                                                                           |

| Zn50 vs LQ50           |              |             |                                                                                          |                                                                                             |
|------------------------|--------------|-------------|------------------------------------------------------------------------------------------|---------------------------------------------------------------------------------------------|
| ENSSSCT0<br>0000016255 | -<br>2.70906 | 0.004<br>03 | RAB30, member RAS<br>oncogene<br>family;RAB30;ortholog                                   | RAS-RELATED PROTEIN RAB-30<br>(PTHR24073:SF408)                                             |
| ENSSSCT0<br>0000035464 | -<br>2.55879 | 0.002<br>84 | Uncharacterized<br>protein;LOC100523310;ort<br>holog                                     | GUANYLATE-BINDING PROTEIN<br>6 (PTHR10751:SF62)                                             |
| ENSSSCT0<br>0000061852 | -<br>1.65906 | 0.014<br>43 | Apolipoprotein A-<br>IV;APOA4;ortholog                                                   | APOLIPOPROTEIN A-IV<br>(PTHR18976:SF1)                                                      |
| ENSSSCT0<br>0000011816 | -<br>1.40772 | 0.029<br>51 | Hexosyltransferase;B3GAL<br>T2;ortholog                                                  | BETA-1,3-<br>GALACTOSYLTRANSFERASE 2<br>(PTHR11214:SF19)                                    |
| ENSSSCT0<br>0000058969 | -<br>1.19064 | 0.047<br>71 | GMP<br>reductase;GMPR;ortholog                                                           | GMP REDUCTASE 1<br>(PTHR43170:SF3)                                                          |
| ENSSSCT0<br>0000045468 | -<br>1.14623 | 0.006<br>84 | Histo-blood group ABO<br>system<br>transferase;GBGT1;ortholo<br>g                        | GLOBOSIDE ALPHA-1,3-N-<br>ACETYLGALACTOSAMINYLTRA<br>NSFERASE 1 (PTHR10462:SF29)            |
| ENSSSCT0<br>0000002555 | -<br>1.00938 | 0.010<br>81 | Arginase;ARG2;ortholog                                                                   | ARGINASE-2, MITOCHONDRIAL<br>(PTHR43782:SF4)                                                |
| ENSSSCT0<br>0000031638 | -<br>0.98305 | 0.011<br>41 | Uncharacterized<br>protein;KDM4A;ortholog                                                | LYSINE-SPECIFIC<br>DEMETHYLASE 4A<br>(PTHR10694:SF32)                                       |
| ENSSSCT0<br>0000003489 | -<br>0.93477 | 0.040<br>99 | Galactoside 2-alpha-L-<br>fucosyltransferase<br>2;FUT2;ortholog                          | GALACTOSIDE 2-ALPHA-L-<br>FUCOSYLTRANSFERASE 2<br>(PTHR11927:SF2)                           |
| ENSSSCT0<br>0000006932 | -<br>0.89043 | 0.005<br>97 | 4-<br>trimethylaminobutyraldehy<br>de<br>dehydrogenase;ALDH9A1;<br>ortholog              | 4-<br>TRIMETHYLAMINO BUTYRALDE<br>HYDE DEHYDROGENASE<br>(PTHR11699:SF228)                   |
| ENSSSCT0<br>0000044789 | -<br>0.80731 | 0.018<br>32 | Succinyl-CoA:3-ketoacid<br>coenzyme A transferase 1,<br>mitochondrial;OXCT1;orth<br>olog | SUCCINYL-COA:3-KETOACID<br>COENZYME A TRANSFERASE 1,<br>MITOCHONDRIAL<br>(PTHR13707:SF30)   |
| ENSSSCT0<br>0000061681 | -<br>0.79278 | 0.007<br>07 | Argininosuccinate synthase<br>1;ASS1;ortholog                                            | ARGININOSUCCINATE<br>SYNTHASE (PTHR11587:SF2)                                               |
| ENSSSCT0<br>0000011756 | -<br>0.64232 | 0.040<br>39 | DEAH-box helicase 32<br>(putative);DHX32;ortholog                                        | PRE-MRNA-SPLICING FACTOR<br>ATP-DEPENDENT RNA<br>HELICASE DHX32-RELATED<br>(PTHR18934:SF88) |
| ENSSSCT0<br>0000016571 | -<br>0.60487 | 0.020<br>91 | Hepatic and glial cell<br>adhesion<br>molecule;HEPACAM;ortho<br>log                      | HEPATOCYTE CELL ADHESION<br>MOLECULE (PTHR12080:SF59)                                       |
| ENSSSCT0<br>0000024524 | -<br>0.58979 | 0.007<br>60 | Uncharacterized<br>protein;PPP4R1;ortholog                                               | SERINE/THREONINE-PROTEIN<br>PHOSPHATASE 4 REGULATORY<br>SUBUNIT 1 (PTHR10648:SF8)           |
| ENSSSCT0<br>0000037199 | -<br>0.58239 | 0.029<br>00 | Dual specificity protein<br>phosphatase;DUSP6;orthol<br>og                               | DUAL SPECIFICITY PROTEIN<br>PHOSPHATASE 6<br>(PTHR10159:SF45)                               |
| ENSSSCT0<br>0000065553 | -<br>0.57552 | 0.016<br>41 | Uridine<br>phosphorylase;UPP1;orthol<br>og                                               | URIDINE PHOSPHORYLASE 1<br>(PTHR43691:SF10)                                                 |

|                        |              |             |                                                                                                             |                                                                                                               |
|------------------------|--------------|-------------|-------------------------------------------------------------------------------------------------------------|---------------------------------------------------------------------------------------------------------------|
| ENSSSCT0<br>0000029497 | -<br>0.56234 | 0.016<br>35 | 7-dehydrocholesterol<br>reductase;DHCR7;ortholog                                                            | 7-DEHYDROCHOLESTEROL<br>REDUCTASE (PTHR21257:SF38)                                                            |
| ENSSSCT0<br>0000057292 | -<br>0.56159 | 0.024<br>72 | Sulfotransferase;CHST4;ort<br>holog                                                                         | CARBOHYDRATE<br>SULFOTRANSFERASE 4<br>(PTHR10704:SF40)                                                        |
| ENSSSCT0<br>0000044432 | -<br>0.52325 | 0.035<br>27 | Serine/threonine kinase<br>24;STK24;ortholog                                                                | SERINE/THREONINE-PROTEIN<br>KINASE 24 (PTHR24361:SF406)                                                       |
| ENSSSCT0<br>0000003977 | -<br>0.50887 | 0.041<br>96 | Sphingomyelin<br>phosphodiesterase acid like<br>3B;SMPDL3B;ortholog                                         | ACID SPHINGOMYELINASE-LIKE<br>PHOSPHODIESTERASE 3B<br>(PTHR10340:SF25)                                        |
| ENSSSCT0<br>0000053991 | -<br>0.47170 | 0.006<br>15 | RAB7A, member RAS<br>oncogene<br>family;RAB7A;ortholog                                                      | RAS-RELATED PROTEIN RAB-7A<br>(PTHR24073:SF556)                                                               |
| ENSSSCT0<br>0000053600 | -<br>0.42187 | 0.042<br>58 | Rho GTPase activating<br>protein<br>17;ARHGAP17;ortholog                                                    | RHO GTPASE-ACTIVATING<br>PROTEIN 17 (PTHR14130:SF3)                                                           |
| ENSSSCT0<br>0000055437 | -<br>0.41019 | 0.017<br>55 | Serine/threonine-protein<br>phosphatase 2A<br>activator;PTPA;ortholog                                       | SERINE/THREONINE-PROTEIN<br>PHOSPHATASE 2A ACTIVATOR<br>(PTHR10012:SF0)                                       |
| ENSSSCT0<br>0000063535 | -<br>0.40673 | 0.028<br>98 | Citrate<br>synthase;CS;ortholog                                                                             | CITRATE SYNTHASE,<br>MITOCHONDRIAL<br>(PTHR11739:SF8)                                                         |
| ENSSSCT0<br>0000011231 | -<br>0.37573 | 0.026<br>91 | Pyrophosphatase<br>(inorganic)<br>1;PPA1;ortholog                                                           | INORGANIC<br>PYROPHOSPHATASE<br>(PTHR10286:SF47)                                                              |
| ENSSSCT0<br>0000014210 | -<br>0.35799 | 0.041<br>50 | Calpain-1 catalytic<br>subunit;CAPN1;ortholog                                                               | CALPAIN-1 CATALYTIC<br>SUBUNIT (PTHR10183:SF284)                                                              |
| ENSSSCT0<br>0000044242 | -<br>0.31781 | 0.016<br>44 | Adhesion regulating<br>molecule<br>1;ADRM1;ortholog                                                         | PROTEASOMAL UBIQUITIN<br>RECEPTOR ADRM1<br>(PTHR12225:SF0)                                                    |
| ENSSSCT0<br>0000042867 | -<br>0.31488 | 0.041<br>77 | Rho GDP dissociation<br>inhibitor<br>alpha;ARHGDI;ortholog                                                  | RHO GDP-DISSOCIATION<br>INHIBITOR 1 (PTHR10980:SF9)                                                           |
| ENSSSCT0<br>0000003774 | -<br>0.27872 | 0.016<br>23 | 6-phosphogluconate<br>dehydrogenase,<br>decarboxylating;PGD;ortho<br>log                                    | 6-PHOSPHOGLUCONATE<br>DEHYDROGENASE,<br>DECARBOXYLATING<br>(PTHR11811:SF25)                                   |
| ENSSSCT0<br>0000030514 | -<br>0.27528 | 0.045<br>31 | Serine/threonine-protein<br>phosphatase 2A 65 kDa<br>regulatory subunit A alpha<br>isoform;PPP2R1A;ortholog | SERINE/THREONINE-PROTEIN<br>PHOSPHATASE 2A 65 KDA<br>REGULATORY SUBUNIT A<br>ALPHA ISOFORM<br>(PTHR10648:SF2) |
| ENSSSCT0<br>0000039540 | -<br>0.21554 | 0.033<br>90 | Ras-related C3 botulinum<br>toxin substrate<br>1;RAC1;ortholog                                              | RAS-RELATED C3 BOTULINUM<br>TOXIN SUBSTRATE 1<br>(PTHR24072:SF105)                                            |
| ENSSSCT0<br>0000019677 | -<br>0.68365 | 0.042<br>00 | Cytochrome c oxidase<br>subunit 3;MT-<br>CO3;ortholog                                                       | CYTOCHROME C OXIDASE<br>SUBUNIT 3 (PTHR11403:SF7)                                                             |
| ENSSSCT0<br>0000019673 | -<br>0.68503 | 0.037<br>49 | Cytochrome c oxidase<br>subunit 2;COX2;ortholog                                                             | CYTOCHROME C OXIDASE<br>SUBUNIT 2 (PTHR22888:SF9)                                                             |
| ENSSSCT0<br>0000019679 | -<br>0.69623 | 0.036<br>16 | NADH-ubiquinone<br>oxidoreductase chain 3;MT-<br>ND3;ortholog                                               | NADH-UBIQUINONE<br>OXIDOREDUCTASE CHAIN 3<br>(PTHR11058:SF9)                                                  |
| ENSSSCT0<br>0000019675 | -<br>0.72406 | 0.043<br>97 | ATP synthase protein<br>8;MT-ATP8;ortholog                                                                  | ATP SYNTHASE PROTEIN 8<br>(PTHR13722:SF0)                                                                     |

|                        |         |             |                                                                            |                                                                       |
|------------------------|---------|-------------|----------------------------------------------------------------------------|-----------------------------------------------------------------------|
| ENSSSCT0<br>0000019670 | 0.73158 | 0.042<br>51 | Cytochrome c oxidase<br>subunit 1;MT-<br>CO1;ortholog                      | CYTOCHROME C OXIDASE<br>SUBUNIT 1 (PTHR10422:SF18)                    |
| ENSSSCT0<br>0000006801 | 0.73190 | 0.036<br>00 | Non-specific<br>serine/threonine protein<br>kinase;SGK3;ortholog           | SERINE/THREONINE-PROTEIN<br>KINASE SGK3 (PTHR24356:SF121)             |
| ENSSSCT0<br>0000051906 | 0.73500 | 0.013<br>45 | Ubiquitin carboxyl-terminal<br>hydrolase<br>34;USP34;ortholog              | UBIQUITIN CARBOXYL-<br>TERMINAL HYDROLASE 34<br>(PTHR24006:SF671)     |
| ENSSSCT0<br>0000019682 | 0.79478 | 0.028<br>31 | NADH-ubiquinone<br>oxidoreductase chain 4;MT-<br>ND4;ortholog              | NADH-UBIQUINONE<br>OXIDOREDUCTASE CHAIN 4<br>(PTHR43507:SF1)          |
| ENSSSCT0<br>0000019686 | 0.83361 | 0.037<br>18 | NADH-ubiquinone<br>oxidoreductase chain 5;MT-<br>ND5;ortholog              | NADH-UBIQUINONE<br>OXIDOREDUCTASE CHAIN 5<br>(PTHR42829:SF2)          |
| ENSSSCT0<br>0000019681 | 0.85735 | 0.031<br>73 | NADH-ubiquinone<br>oxidoreductase chain<br>4L;MT-ND4L;ortholog             | NADH-UBIQUINONE<br>OXIDOREDUCTASE CHAIN 4L<br>(PTHR11434:SF0)         |
| ENSSSCT0<br>0000035892 | 0.88067 | 0.004<br>38 | Putative deoxyribonuclease<br>TATDN1;TATDN1;ortholo<br>g                   | DEOXYRIBONUCLEASE<br>TATDN1-RELATED<br>(PTHR10060:SF15)               |
| ENSSSCT0<br>0000005070 | 0.90442 | 0.034<br>59 | Ring finger protein<br>111;RNF111;ortholog                                 | E3 UBIQUITIN-PROTEIN LIGASE<br>ARKADIA (PTHR16200:SF4)                |
| ENSSSCT0<br>0000025069 | 0.94736 | 0.036<br>15 | Limb and CNS expressed<br>1;LIX1;ortholog                                  | PROTEIN LIMB EXPRESSION 1<br>HOMOLOG (PTHR31139:SF5)                  |
| ENSSSCT0<br>0000054049 | 1.88216 | 0.045<br>42 | ST3 beta-galactoside alpha-<br>2,3-sialyltransferase<br>6;ST3GAL6;ortholog | TYPE 2 LACTOSAMINE ALPHA-<br>2,3-SIALYLTRANSFERASE<br>(PTHR13713:SF8) |
|                        |         |             |                                                                            |                                                                       |

**Supplementary Table S7. Genes related to molecular function regulators**

| ID                    | Log2 Fold Change | p-value     | Gene Name                                                                                          | Panther Family                                                                                    |
|-----------------------|------------------|-------------|----------------------------------------------------------------------------------------------------|---------------------------------------------------------------------------------------------------|
| <b>Zn100 vs LQ100</b> |                  |             |                                                                                                    |                                                                                                   |
| ENSSSCT0000055045     | -<br>1.92313     | 0.0474<br>6 | TBC1 domain family member<br>7;TBC1D7;ortholog                                                     | TBC1 DOMAIN FAMILY MEMBER 7 (PTHR13530:SF3)                                                       |
| ENSSSCT0000000767     | -<br>1.05695     | 0.0025<br>9 | CD27 antigen precursor;CD27;ortholog                                                               | CD27 ANTIGEN (PTHR47496:SF1)                                                                      |
| ENSSSCT0000046389     | -<br>0.39636     | 0.0010<br>7 | GrpE protein homolog;GRPEL1;ortholog                                                               | GRPE PROTEIN HOMOLOG 1, MITOCHONDRIAL (PTHR21237:SF25)                                            |
| ENSSSCT0000054388     | -<br>0.34691     | 0.0337<br>5 | BRCA2 and CDKN1A-interacting protein;BCCIP;ortholog                                                | BRCA2 AND CDKN1A-INTERACTING PROTEIN (PTHR13261:SF0)                                              |
|                       |                  |             |                                                                                                    |                                                                                                   |
| <b>Zn50 vs LQ50</b>   |                  |             |                                                                                                    |                                                                                                   |
| ENSSSCT0000015136     | -<br>2.70160     | 0.0041<br>5 | Epidermal growth factor receptor pathway substrate 15 like 1;EPS15L1;ortholog                      | EPIDERMAL GROWTH FACTOR RECEPTOR SUBSTRATE 15-LIKE 1 (PTHR11216:SF69)                             |
| ENSSSCT0000061852     | -<br>1.65906     | 0.0144<br>3 | Apolipoprotein A-IV;APOA4;ortholog                                                                 | APOLIPOPROTEIN A-IV (PTHR18976:SF1)                                                               |
| ENSSSCT0000024524     | -<br>0.58979     | 0.0076<br>0 | Uncharacterized protein;PPP4R1;ortholog                                                            | SERINE/THREONINE-PROTEIN PHOSPHATASE 4 REGULATORY SUBUNIT 1 (PTHR10648:SF8)                       |
| ENSSSCT0000053600     | -<br>0.42187     | 0.0425<br>8 | Rho GTPase activating protein 17;ARHGAP17;ortholog                                                 | RHO GTPASE-ACTIVATING PROTEIN 17 (PTHR14130:SF3)                                                  |
| ENSSSCT0000055437     | -<br>0.41019     | 0.0175<br>5 | Serine/threonine-protein phosphatase 2A activator;PTPA;ortholog                                    | SERINE/THREONINE-PROTEIN PHOSPHATASE 2A ACTIVATOR (PTHR10012:SF0)                                 |
| ENSSSCT0000044242     | -<br>0.31781     | 0.0164<br>4 | Adhesion regulating molecule 1;ADRM1;ortholog                                                      | PROTEASOMAL UBIQUITIN RECEPTOR ADRM1 (PTHR12225:SF0)                                              |
| ENSSSCT0000042867     | -<br>0.31488     | 0.0417<br>7 | Rho GDP dissociation inhibitor alpha;ARHGDI1;ortholog                                              | RHO GDP-DISSOCIATION INHIBITOR 1 (PTHR10980:SF9)                                                  |
| ENSSSCT0000030514     | -<br>0.27528     | 0.0453<br>1 | Serine/threonine-protein phosphatase 2A 65 kDa regulatory subunit A alpha isoform;PPP2R1A;ortholog | SERINE/THREONINE-PROTEIN PHOSPHATASE 2A 65 KDA REGULATORY SUBUNIT A ALPHA ISOFORM (PTHR10648:SF2) |
| ENSSSCT0000006801     | -<br>0.73190     | 0.0360<br>0 | Non-specific serine/threonine protein kinase;SGK3;ortholog                                         | SERINE/THREONINE-PROTEIN KINASE SGK3 (PTHR24356:SF121)                                            |
|                       |                  |             |                                                                                                    |                                                                                                   |

**Supplementary Table S8. Genes related to molecular transducer activity**

| <b>ID</b>              | <b>Log2<br/>Fold<br/>Change</b> | <b>p-<br/>value</b> | <b>Gene Name</b>                                           | <b>Panther Family</b>                                          |
|------------------------|---------------------------------|---------------------|------------------------------------------------------------|----------------------------------------------------------------|
| <b>Zn100 vs LQ100</b>  |                                 |                     |                                                            |                                                                |
| ENSSSCT000<br>00054388 | -<br>0.3469                     | 0.033<br>7          | BRCA2 and CDKN1A-<br>interacting<br>protein;BCCIP;ortholog | BRCA2 AND CDKN1A-<br>INTERACTING PROTEIN<br>(PTHR13261:SF0)    |
| ENSSSCT000<br>00044681 | 0.5222                          | 0.017<br>1          | Interleukin 13 receptor,<br>alpha 1;IL13RA1;ortholog       | INTERLEUKIN-13 RECEPTOR<br>SUBUNIT ALPHA-1<br>(PTHR23036:SF89) |
| ENSSSCT000<br>00053543 | 1.3379                          | 0.005<br>6          | Chemokine C-C motif<br>receptor-like<br>2;CCRL2;ortholog   | C-C CHEMOKINE RECEPTOR-<br>LIKE 2 (PTHR10489:SF655)            |
|                        |                                 |                     |                                                            |                                                                |
| <b>Zn50 vs LQ50</b>    |                                 |                     |                                                            |                                                                |
| ENSSSCT000<br>00062032 | -<br>1.2090                     | 0.039<br>5          | Semaphorin<br>4B;SEMA4B;ortholog                           | SEMAPHORIN-4B<br>(PTHR11036:SF14)                              |
| ENSSSCT000<br>00046065 | 1.1418                          | 0.030<br>8          | High mobility group<br>protein<br>B1;HMGB1;ortholog        | SUBFAMILY NOT NAMED<br>(PTHR13711:SF328)                       |
| ENSSSCT000<br>00032954 | 2.0028                          | 0.033<br>1          | Interleukin-<br>33;IL33;ortholog                           | INTERLEUKIN-33<br>(PTHR21114:SF0)                              |
|                        |                                 |                     |                                                            |                                                                |

**Supplementary Table S9. Genes related to structural molecular activity**

| ID                    | Log2 Fold Change | p-value | Gene Name                                      | Panther Family                                              |
|-----------------------|------------------|---------|------------------------------------------------|-------------------------------------------------------------|
| <b>Zn100 vs LQ100</b> |                  |         |                                                |                                                             |
| ENSSSCT00000066361    | -1.2765          | 0.0184  | Ribosomal protein L15;RPL15;ortholog           | SUBFAMILY NOT NAMED (PTHR11847:SF20)                        |
| ENSSSCT00000043658    | -0.6041          | 0.0113  | Tubulin beta chain;TUBB4B;ortholog             | TUBULIN BETA-4B CHAIN (PTHR11588:SF247)                     |
| ENSSSCT00000008748    | -0.4617          | 0.0101  | ICT1;MRPL28;ortholog                           | 39S RIBOSOMAL PROTEIN L28, MITOCHONDRIAL (PTHR13528:SF2)    |
| ENSSSCT00000054538    | -0.4327          | 0.0183  | 40S ribosomal protein S9;RPS9;ortholog         | 40S RIBOSOMAL PROTEIN S9 (PTHR11831:SF5)                    |
| ENSSSCT00000064200    | -0.3477          | 0.0156  | Ribosomal protein L19;RPL19;ortholog           | 60S RIBOSOMAL PROTEIN L19 (PTHR10722:SF13)                  |
| ENSSSCT00000014851    | -0.3333          | 0.0063  | 40S ribosomal protein S28;RPS28;ortholog       | 40S RIBOSOMAL PROTEIN S28 (PTHR10769:SF3)                   |
| ENSSSCT00000031015    | -0.3273          | 0.0273  | Ribosomal protein L8;RPL8;ortholog             | 60S RIBOSOMAL PROTEIN L8 (PTHR13691:SF16)                   |
| ENSSSCT00000063010    | -0.3111          | 0.0034  | 60S ribosomal protein L3;RPL3;ortholog         | 60S RIBOSOMAL PROTEIN L3 (PTHR11363:SF4)                    |
| ENSSSCT00000003515    | -0.3081          | 0.0455  | 40S ribosomal protein S11;RPS11;ortholog       | 40S RIBOSOMAL PROTEIN S11 (PTHR10744:SF9)                   |
| ENSSSCT00000016207    | -0.3036          | 0.0018  | 40S ribosomal protein S3;RPS3;ortholog         | 40S RIBOSOMAL PROTEIN S3 (PTHR11760:SF32)                   |
| ENSSSCT00000049763    | -0.2901          | 0.0064  | 60S acidic ribosomal protein P0;RPLP0;ortholog | 60S ACIDIC RIBOSOMAL PROTEIN P0-RELATED (PTHR45699:SF1)     |
| ENSSSCT00000041942    | -0.2739          | 0.0372  | 40S ribosomal protein S19;RPS19;ortholog       | 40S RIBOSOMAL PROTEIN S19 (PTHR11710:SF0)                   |
| ENSSSCT00000015437    | -0.2723          | 0.0457  | 40S ribosomal protein S23;RPS23;ortholog       | 40S RIBOSOMAL PROTEIN S23 (PTHR11652:SF45)                  |
| ENSSSCT00000005457    | -0.2525          | 0.0151  | 60S ribosomal protein L4;RPL4;ortholog         | 60S RIBOSOMAL PROTEIN L4 (PTHR19431:SF0)                    |
| ENSSSCT00000027316    | -0.2456          | 0.0258  | 60S ribosomal protein L29;RPL29;ortholog       | 60S RIBOSOMAL PROTEIN L29 (PTHR12884:SF18)                  |
| ENSSSCT00000014615    | -0.2427          | 0.0229  | 40S ribosomal protein S13;RPS13;ortholog       | 40S RIBOSOMAL PROTEIN S13 (PTHR11885:SF14)                  |
| ENSSSCT00000015919    | -0.2222          | 0.0182  | 60S ribosomal protein L27a;RPL27A;ortholog     | 60S RIBOSOMAL PROTEIN L27A (PTHR11721:SF3)                  |
| ENSSSCT00000043834    | -0.2132          | 0.0097  | 40S ribosomal protein S20;RPS20;ortholog       | RIBOSOMAL PROTEIN S20 (PTHR11700:SF8)                       |
| ENSSSCT00000024076    | -0.1998          | 0.0499  | 60S ribosomal protein L26;RPL26;ortholog       | 60S RIBOSOMAL PROTEIN L26 (PTHR11143:SF11)                  |
| <b>Zn50 vs LQ50</b>   |                  |         |                                                |                                                             |
| ENSSSCT00000064525    | -0.4788          | 0.0459  | Arp2/3 complex 34 kDa subunit;ARPC2;ortholog   | ACTIN-RELATED PROTEIN 2/3 COMPLEX SUBUNIT 2 (PTHR12058:SF0) |



|                        |             |            |                                       |                                           |
|------------------------|-------------|------------|---------------------------------------|-------------------------------------------|
| ENSSSCT000<br>00065139 | -<br>0.3094 | 0.033<br>0 | Actin, cytoplasmic<br>1;ACTB;ortholog | ACTIN, CYTOPLASMIC 1<br>(PTHR11937:SF192) |
|                        |             |            |                                       |                                           |

**Supplementary Table S10. Genes related to transcription regulator activity**

| ID                     | Log2<br>Fold<br>Change | p-<br>value | Gene Name                                                                                               | Panther Family                                                                                                  |
|------------------------|------------------------|-------------|---------------------------------------------------------------------------------------------------------|-----------------------------------------------------------------------------------------------------------------|
| <b>Zn100 vs LQ100</b>  |                        |             |                                                                                                         |                                                                                                                 |
| ENSSSCT000<br>00040161 | -2.8331                | 0.009<br>1  | Regulatory factor<br>X7;RFX7;ortholog                                                                   | DNA-BINDING PROTEIN RFX7<br>(PTHR12619:SF2)                                                                     |
| ENSSSCT000<br>00012564 | -2.3531                | 0.039<br>3  | Chromosome 3 open<br>reading frame<br>67;C3orf67;ortholog                                               | ZGC:162324 (PTHR12458:SF7)                                                                                      |
| ENSSSCT000<br>00040645 | -0.7488                | 0.030<br>4  | Interferon regulatory<br>factor 8;IRF8;ortholog                                                         | INTERFERON REGULATORY<br>FACTOR 8 (PTHR11949:SF7)                                                               |
| ENSSSCT000<br>00063738 | -0.6388                | 0.023<br>1  | Transcription factor<br>3;TCF3;ortholog                                                                 | TRANSCRIPTION FACTOR E2-<br>ALPHA (PTHR11793:SF7)                                                               |
| ENSSSCT000<br>00043336 | -0.5610                | 0.048<br>0  | Copine-<br>1;CPNE1;ortholog                                                                             | COPINE-1 (PTHR10857:SF2)                                                                                        |
| ENSSSCT000<br>00028688 | -0.4170                | 0.037<br>2  | SERTA domain<br>containing<br>1;SERTAD1;ortholog                                                        | SERTA DOMAIN-CONTAINING<br>PROTEIN 1 (PTHR16277:SF12)                                                           |
| ENSSSCT000<br>00000090 | -0.1510                | 0.046<br>9  | Cyclic AMP-dependent<br>transcription factor ATF-<br>4;ATF4;ortholog                                    | CYCLIC AMP-DEPENDENT<br>TRANSCRIPTION FACTOR ATF-4<br>(PTHR13044:SF2)                                           |
| ENSSSCT000<br>00056298 | 0.3836                 | 0.019<br>1  | Class E basic helix-loop-<br>helix protein<br>40;BHLHE40;ortholog                                       | CLASS E BASIC HELIX-LOOP-<br>HELIX PROTEIN 40<br>(PTHR10985:SF3)                                                |
| ENSSSCT000<br>00018974 | 0.4091                 | 0.041<br>6  | Junction<br>plakoglobin;JUP;ortholo<br>g                                                                | JUNCTION PLAKOGLOBIN<br>(PTHR45976:SF3)                                                                         |
| ENSSSCT000<br>00056807 | 0.4429                 | 0.044<br>7  | MAX dimerization<br>protein<br>1;MXD1;ortholog                                                          | MAX DIMERIZATION PROTEIN 1<br>(PTHR11969:SF18)                                                                  |
| ENSSSCT000<br>00001722 | 0.6067                 | 0.033<br>4  | Transcriptional enhancer<br>factor TEF-<br>5;TEAD3;ortholog                                             | TRANSCRIPTIONAL ENHANCER<br>FACTOR TEF-5 (PTHR11834:SF0)                                                        |
| <b>Zn50 vs LQ50</b>    |                        |             |                                                                                                         |                                                                                                                 |
| ENSSSCT000<br>00061466 | -2.5828                | 0.011<br>3  | Transcription elongation<br>factor A N-terminal and<br>central domain<br>containing;TCEANC;ort<br>holog | TRANSCRIPTION ELONGATION<br>FACTOR A N-TERMINAL AND<br>CENTRAL DOMAIN-<br>CONTAINING PROTEIN<br>(PTHR11477:SF7) |
| ENSSSCT000<br>00057064 | -2.2298                | 0.027<br>7  | Polyhomeotic homolog<br>3;PHC3;ortholog                                                                 | POLYHOMEOTIC-LIKE PROTEIN<br>3 (PTHR12247:SF88)                                                                 |
| ENSSSCT000<br>00002141 | -1.1070                | 0.005<br>5  | Promyelocytic<br>leukemia;PML;ortholog                                                                  | PROTEIN PML (PTHR25462:SF241)                                                                                   |

|                        |         |            |                                                                  |                                                                    |
|------------------------|---------|------------|------------------------------------------------------------------|--------------------------------------------------------------------|
| ENSSSCT000<br>00031638 | -0.9830 | 0.011<br>4 | Uncharacterized<br>protein;KDM4A;ortholog                        | LYSINE-SPECIFIC<br>DEMETHYLASE 4A<br>(PTHR10694:SF32)              |
| ENSSSCT000<br>00035232 | -0.7662 | 0.022<br>3 | Interferon regulatory<br>factor 7;Irf7;ortholog                  | INTERFERON REGULATORY<br>FACTOR 7 (PTHR11949:SF2)                  |
| ENSSSCT000<br>00001791 | 0.9390  | 0.049<br>7 | Nuclear transcription<br>factor Y subunit<br>alpha;NFYA;ortholog | NUCLEAR TRANSCRIPTION<br>FACTOR Y SUBUNIT ALPHA<br>(PTHR12632:SF6) |
| ENSSSCT000<br>00046065 | 1.1418  | 0.030<br>8 | High mobility group<br>protein<br>B1;HMGB1;ortholog              | SUBFAMILY NOT NAMED<br>(PTHR13711:SF328)                           |
| ENSSSCT000<br>00040161 | 2.4144  | 0.038<br>8 | Regulatory factor<br>X7;RFX7;ortholog                            | DNA-BINDING PROTEIN RFX7<br>(PTHR12619:SF2)                        |
|                        |         |            |                                                                  |                                                                    |
